# Supplementary material
Source: ML conference proceedings conference paper supplement (https://openreview.net/forum?id=spvaV5LELF)
Supplement: supplementary_material [file attachment]

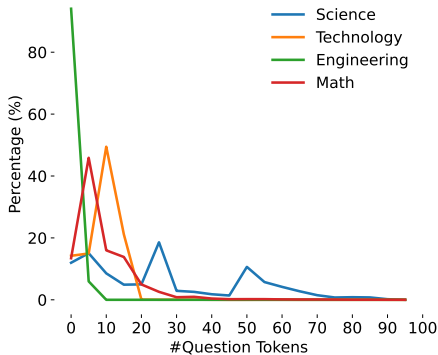

Figure 14: Question length distribution.

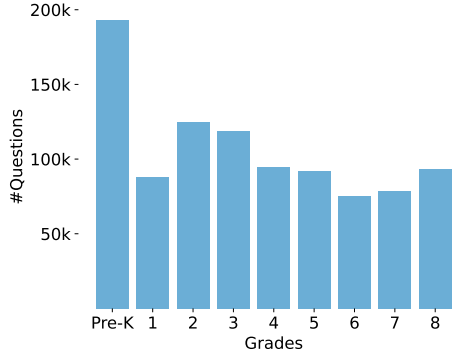

Figure 15: #Questions per grade.

Table 3: Skill comparison between STEM and existing datasets (IconQA and ScienceQA).

| (a) Number of skills. |        |           |      | (b) Skill comparison between STEM and IconQA. |                                                                |                                         |
|-----------------------|--------|-----------|------|-----------------------------------------------|----------------------------------------------------------------|-----------------------------------------|
| Subject               | IconQA | ScienceQA | STEM | IconQA                                        | STEM                                                           |                                         |
| Science               | 0      | 167       | 82   | Counting                                      | Count to 10, Count shapes in rows, Count sides and corners ... |                                         |
| Technology            | 0      | 0         | 9    | Geometry                                      | Classify triangles, Identify symmetry, Identify shapes ...     |                                         |
| Engineering           | 0      | 0         | 6    | Time                                          | Match times, Identify A.M./P.M., Read a calendar ...           |                                         |
| Math                  | 13     | 0         | 351  | ...                                           | ...                                                            |                                         |
| Total                 | 13     | 167       | 448  | Not cover                                     | Science                                                        | Compare concentrations of solutions ... |
|                       |        |           |      |                                               | Technology                                                     | Identify peripherals ...                |
|                       |        |           |      |                                               | Engineering                                                    | Identify laboratory tools ...           |
|                       |        |           |      |                                               | Math                                                           | Linear and exponential functions ...    |

**Skill Comparison** We compare the skills of STEM with other related datasets in Table 3. STEM contains the largest skill set among existing datasets, with a great number of new skills introduced to STEM that are not yet covered by existing datasets, e.g., skills in technology and engineering.

## A.2 MODELS

In this section, we introduce the foundation models we benchmark in detail.

### Vision-Language Models

**CLIP (Radford et al., 2021).** CLIP is pretrained on a sufficiently large dataset of 400 million text-image pairs across the Internet. It uses a Transformer as the text encoder, and has several variants of image encoder, including ResNet (RN) backbones and Vision Transformers (ViT) (Dosovitskiy et al., 2020). CLIP aligns the text and image representation by training on in-batch contrastive loss, and is able to zero-shot transfer to downstream vision language tasks. To align with CLIP pretraining, we formulate question answering as matching text and images. We use the cosine similarity between the text and image embeddings as the matching function, the same as the original zero-shot image-text retrieval settings in CLIP (Radford et al., 2021).

**ViLBERT and 12-in-1 (Lu et al., 2019; 2020).** ViLBERT adopts two parallel streams to process image regions and text segments separately, with co-attentional transformer layers connecting them. There is also a multi-task version called 12-in-1 (Lu et al., 2020) that trains 12 different tasks with individual task-specific heads sharing 1 “trunk” ViLBERT model. Its multi-modal alignment prediction serves as the matching score.

**UNITER (Chen et al., 2020b).** UNITER consists of an Image Embedder with Faster R-CNN (Anderson et al., 2018), a Text Embedder with Transformer (Vaswani et al., 2017), as well as a multi-layer Transformer to get cross-modality representation. During inference on STEM, the matching

score function is the same as CLIP, i.e., the cosine similarity between the text and image embeddings (Chen et al., 2020b).

**Virtex (Desai & Johnson, 2021).** Virtex first extracts visual features with ResNet-50 (He et al., 2016) backbone. The visual features are then fed into a text head, which consists of two unidirectional Transformers, to predict captions. We extract the image feature with the image encoder, then feed text into the textual head and use the sum of bidirectional generation logits as the matching score.

### Language Models

**GPT-3 (Chen et al., 2020a) and GPT-3.5-Turbo (Ouyang et al., 2022).** These foundation language models are generation models pretrained on a large corpus of text. We use the OpenAI API “text-davinci-002” and “gpt-3.5-turbo” corresponding to the best-performing GPT-3 and GPT-3.5-Turbo respectively. We formalize the evaluation task as a question-answering task. The input to GPT-3 and GPT-3.5-Turbo is the concatenation of the question text, the context text, and multiple answer options. The output is to predict a final answer from answer options. For images in questions, we follow Lu et al. (2022) to convert them to visual context text based on a captioning model consisting of ViT (Dosovitskiy et al., 2020) and GPT-2 (Radford et al., 2019).

**UnifiedQA (Khashabi et al., 2020).** UnifiedQA is a pretrained question-answering model. We use both its base and small versions. Its evaluation setup is the same as that of GPT-3 and GPT-3.5-Turbo.

**GloVe (Pennington et al., 2014).** GloVe is a pretrained word embedding model. We use the similarity between the average embedding of the concatenation of the question and context and the average embedding of each answer option. The answer option with the largest similarity score is the answer output. We use average pooling based on the 300-dimensional word embeddings. The images are also converted to text using the same method as GPT-3 and GPT-3.5-Turbo.

### A.3 EVALUATION SETTINGS

We benchmark state-of-the-art foundation models on STEM under different settings, including zero-shot, few-shot, finetuning, and multi-task.

(i) **Zero-Shot.** We use CLIP (Radford et al., 2021), ViLBERT (Lu et al., 2019), 12-in-1 (Lu et al., 2020), UNITER (Chen et al., 2020b), and Virtex (Desai & Johnson, 2021) for the zero-shot evaluation of foundation multimodal models. CLIP is the state-of-the-art multimodal model. For zero-shot CLIP, we follow its original setup in Radford et al. (2021). The input to the text encoder is the concatenation of the question text and an answer option. The input to the image encoder is the image context. The output is the cosine similarity scores between the text embeddings and image embedding. Then the answer option with the largest similarity score serves as an answer. For questions with image answer options, the input to the image encoder will also add the image answer options.

(ii) **Few-Shot.** We also use CLIP to benchmark the multimodal few-shot results. For  $k$ -shot setup, we randomly select  $k$  questions for each skill from the training set as a meta training set. For each STEM subject, we train the model on the meta training set and select the best model on the validation set. At test time, the evaluation is the same as the zero-shot setup.

(iii) **Finetuning.** We also finetune CLIP on the entire training set for each subject. The remaining setup is the same as the few-shot setting.

(iv) **Multi-Task.** Under this setting, we train CLIP on the mixture of training sets of four subjects to produce a single model for all subjects.

### A.4 DATASET COLLECTION

We collect science, engineering and math problems from *IXL*<sup>1</sup>, and technology problems from *ProProfs Quizzes*<sup>2</sup> and *Triviaplaza*<sup>3</sup>. We first collect multi-choice problems that have at least one image in either question context or answers. We collect at most 2,000 problems for each skill and remove duplicated problems. There are many formulas embedded in math problems that are not

<sup>1</sup><https://www.ixl.com/>

<sup>2</sup><https://www.proprofs.com/quiz-school>

<sup>3</sup><https://www.triviaplaza.com/>

Table 4: Results of CLIP with different training schemes.

|      | Method     | Science | Technology | Engineering | Math | Average |
|------|------------|---------|------------|-------------|------|---------|
| CLIP | Zero-Shot  | 50.3    | 68.7       | 55.1        | 43.6 | 54.4    |
|      | Few-Shot   | 75.2    | 70.9       | 61.9        | 63.2 | 67.8    |
|      | Finetuning | 87.0    | 71.9       | 67.7        | 78.4 | 76.3    |
|      | Multi-Task | 86.3    | 60.4       | 73.4        | 77.7 | 74.5    |

represented in the text. We use the Mathpix<sup>4</sup> OCR API to convert these math formulas into the latex format.

## B MORE DETAILS ON EXPERIMENTS

### B.1 EXPERIMENTAL SETUP

For the zero-shot setting, we evaluate all models on the test set. For the few-shot, finetuning, and multi-task setting, we train CLIP-ViT-L/14@336px on the corresponding train set, tune hyperparameters on the valid set, and finally evaluate on the test set. We use AdamW for optimization and tune hyperparameters as follows: batch size is chosen from {16, 32, 64, 128}, and set to 16 for few-shot learning, 128 for finetuning and multi-task learning after hyperparameter tuning. The learning rate is chosen between [5e-6, 5e-5] and set to 1e-5 for all training. We set the warm-up ratio to 0.1 and set weight decay as 0.2. We set the maximum of training samples to 100k for finetuning, 200k for multitask training, and 10 epochs for few-shot training, all with early stopping on the valid set. We use NVIDIA GeForce RTX 3090 GPUs for training.

### B.2 DETAILED EXPERIMENTAL ANALYSIS

**Few-Shot** In the few-shot setting, we sample different number of samples in each grade to see how the learning performance varies. Specifically, we sample 16 samples per skill and train CLIP on the sampled data. The results are shown in Table 4. We observe that CLIP gains much improvement in all subjects after few-shot learning. This implies that CLIP has already stored STEM-related knowledge and a few samples are able to trigger such knowledge. We also show performance varies when the number of samples of each skill changes (Figure 16). The overall performance improves with more samples, but 1-shot and 2-shot in technology are worse than zero-shot. Since there are only 9 skills in technology, 1-shot and 2-shot learning in technology might lead to overfitting.

**Multi-Task** We show the results in Table 4. Multi-task learning improves in engineering but performs worse in other subjects compared with individual finetuned models. The reason for the great drop in technology is mainly because its data is much less than other subjects. Multi-task training actually improves performance in engineering. This implies that data from one subject may be beneficial for another when the knowledge is transferable. For example, science shares many common topics with engineering like chemical experiments.

**Number of Answers** We also analyze how model performance changes with the number of answers. The results are shown in Figure 17. We find that for GPT-3, GPT-3.5-Turbo, CLIP zero-shot, and few-shot, the accuracy drops as the number of answers increases, but the accuracy of CLIP finetuning and multi-task does not drop. This implies that models after full training are actually solving the problem rather than guessing, so the number of choices does not affect the performance much.

**Question Lengths** Figure 18 shows how the question length affects model accuracy. For GPT-3, GPT-3.5-Turbo and CLIP zero-shot, the accuracy decreases slightly as the question becomes longer. For tuned models, the same trend holds for questions less than 70 tokens, but the accuracy starts to increase for longer questions. We think this may be caused by some bias in longer questions and the

<sup>4</sup><https://mathpix.com/>

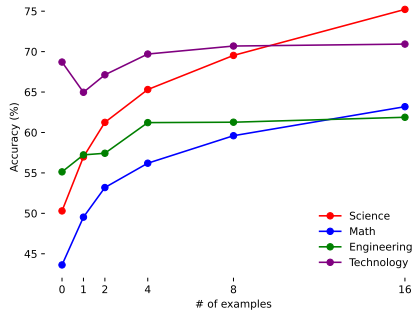

Figure 16: Result of few-shot CLIP.

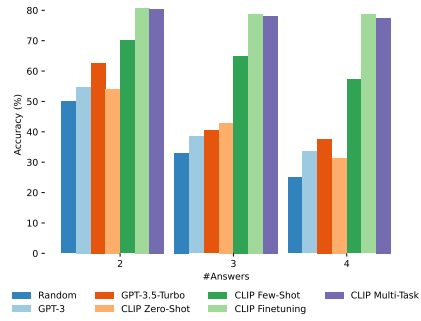

Figure 17: Results on questions with different numbers of answers.

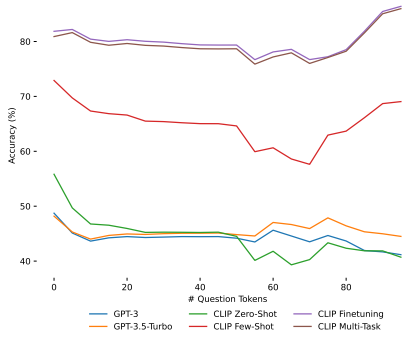

Figure 18: Results on questions with different lengths.

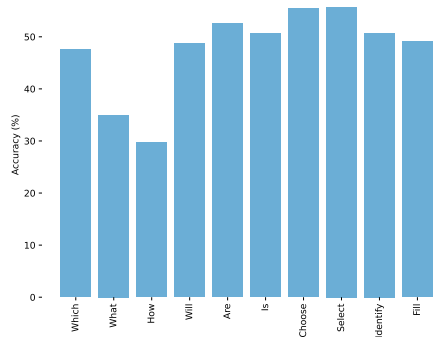

Figure 19: Zero-shot CLIP performance on different question types.

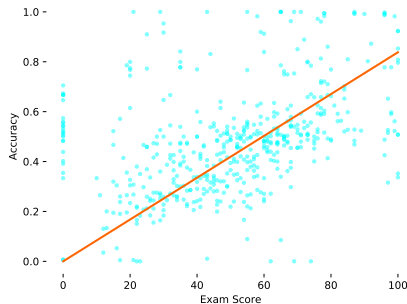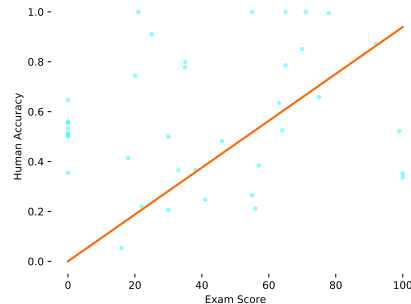

Figure 20: The correlation graphs of exam scores with model accuracy (left) and human accuracy (right).

tuned models learn such bias and achieve higher accuracy. Since there are only a small proportion of questions that are longer than 70 tokens, such bias will not affect the whole dataset much.

**Question Type** We mark the types of problems as the first word in the question or request of each problem. In Figure 19 we show the accuracy of the top 10 frequent types. Questions starting with “What” and “How” have relatively low accuracy, as these questions are more difficult to answer.

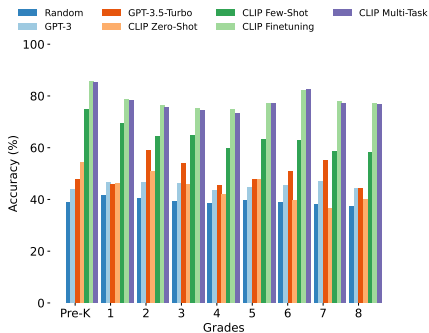

Figure 21: Average accuracies on each grade.

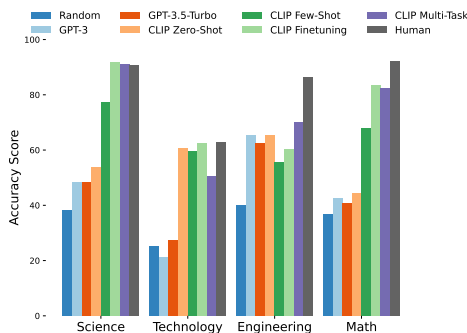

Figure 22: Accuracy on sampled STEM for human performance.

Table 5: Error analysis of CLIP on math and science subsets of STEM.

| Subject | Reason                | Ratio (%) |
|---------|-----------------------|-----------|
| Math    | Commonsense           | 36        |
|         | Numerical calculation | 24        |
|         | Counting              | 16        |
|         | Read table/graph      | 12        |
|         | Transformation        | 12        |
| Science | Comparison            | 40        |
|         | Commonsense           | 32        |
|         | Direction             | 20        |
|         | Read table/graph      | 8         |

**Grades** We show the model accuracy on each grade in Figure 21. There is no obvious performance drop as the increase in grade levels, which is similar to the trend of exam scores. This implies the learning curve for neural models may be different from that of humans.

**Correlation Between Exam Scores and Accuracy** We evaluate exam scores’ correlation with model accuracy and human accuracy(Figure 20). They in general positively correlated to each other. Even though exam score is different from accuracy, it overall captures accuracy as an important factor.

### B.3 ERROR ANALYSIS

To better understand the errors made by CLIP zero-shot, we sample 25 error cases of CLIP zero-shot on math and science. We manually check the reasons for these errors. Table 5 shows the analysis results. For math, 36% errors are caused by a lack of mathematical commonsense, such as area formulas and symmetry. Other errors include failure of calculation (24%), counting objects (16%), reading tables or graphs (12%, e.g., graphs of functions), and transformation (12%, e.g., rotation of a 3D object). For science, comparison causes the most errors with a ratio of 40%. Most of these questions only require a straightforward comparison like the distance between two pairs of magnets. However, CLIP fails on such basic problems. This indicates that it is not good at comparing objects and properties yet. Lacking science commonsense also leads to a good number of errors (32%), followed by identifying directions (20%, e.g., the directions of push and pull, towards and away) and reading tables or graphs (8%).

Moreover, we show the top-5 skills with the most errors of fine-tuned models on math and science subsets in Table 6 and Table 7 respectively.

| Skill                                       | Error Rate | Example                                                                                                                                                                                                                                                                                                                                                                                                                                                                                     |
|---------------------------------------------|------------|---------------------------------------------------------------------------------------------------------------------------------------------------------------------------------------------------------------------------------------------------------------------------------------------------------------------------------------------------------------------------------------------------------------------------------------------------------------------------------------------|
| greatest-and-least-word-problems-up-to-100  | 76.8%      | <p>Description: The school district compared how many swings each elementary school has. Which school has the fewest swings?</p> 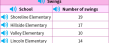 <p>Picture: [Shoreline Elementary, Hillside Elementary, <b>Valley Elementary</b>, Lincoln Elementary, ]</p> <p>Choices: [Shoreline Elementary, Hillside Elementary, <b>Valley Elementary</b>, Lincoln Elementary, ]</p> <p>Answer index: 2</p> <p>Prediction: 0</p>      |
| greatest-and-least-word-problems-up-to-1000 | 76.0%      | <p>Description: Paul kept a log of how many minutes he spent practicing ice skating over the past 4 days. On which day did Paul practice the least?</p>  <p>Picture: [Tuesday, Wednesday, Thursday, <b>Friday</b>, ]</p> <p>Choices: [Tuesday, Wednesday, Thursday, <b>Friday</b>, ]</p> <p>Answer index: 3</p> <p>Prediction: 2</p>                                                                       |
| reading-schedules                           | 75.0%      | <p>Description: Look at the following schedule: Which meeting ends at 12:00 P.M.?</p>  <p>Picture: [the <b>city council meeting</b>, the construction permit meeting, the parking meter meeting, the police meeting, ]</p> <p>Choices: [the <b>city council meeting</b>, the construction permit meeting, the parking meter meeting, the police meeting, ]</p> <p>Answer index: 0</p> <p>Prediction: 2</p> |
| angles-of-90-180-270-and-360-degrees        | 73.8%      | <p>Description: What fraction of a turn is this angle?</p> <p>Picture: </p> <p>Choices: [<math>3/4</math>, 1 full turn, <math>1/2</math>, <math>1/4</math>, ]</p> <p>Answer index: 2</p> <p>Prediction: 3</p>                                                                                                                                                                                              |
| points-lines-line-segments-rays-and-angles  | 73.8%      | <p>Description: What is this?</p> <p>Picture: </p> <p>Choices: [a line segment, <b>a ray</b>, a line, a point, ]</p> <p>Answer index: 1</p> <p>Prediction: 0</p>                                                                                                                                                                                                                                           |

Table 6: Error analysis of top-5 skills with most errors on math.

#### B.4 COMPARISON WITH HUMAN

**Exam Score** We test exam scores on all skills in engineering and technology, and randomly choose 40 skills from math, and 30 skills from science due to technical and time constraints. We compare neural models with humans using the exam score, and the results are shown in Table 8. The detailed scores and skills are listed in Table 10.

**Accuracy** We randomly sample 20 problems for each subject and ask 7 Ph.D. students to answer these questions, and calculate the average accuracy for each subject. To evaluate neural models on these questions, we use the corresponding skill accuracy for each sampled problem as the models’ score on this problem and average all accuracy together as the final score. We do not evaluate models on these sampled data directly since the small number of samples will lead to a large variance, and skill accuracy can avoid such variance. The comparison results are shown in Table 8 and Figure 22. All sampled problems are listed in Table 12 to 17.

#### B.5 ZERO-SHOT PROMPT SENSITIVITY

We study the effect of prompts on CLIP zero-shot. We design 5 types of prompts and demonstrate them with an example problem. The example question is “Which property matches this object?” and the answer is “Rough”. Examples of different prompt types and the corresponding accuracies are shown in Table 9. We observe that “Q+A results in the best performance on average, but the difference is only marginal, meaning that CLIP zero-shot is not very sensitive to the format of prompts.

#### B.6 DETAILED PERFORMANCE ON SKILLS

We show the accuracy of neural models on all 448 skills in Figure 23 to 28. We can see that the zero-shot performance is generally better than random guesses on most skills and achieves near 100% on some skills (e.g., “circles” and “cones”). After finetuning, accuracy improves on most skills and becomes near 100% on many skills.

#### B.7 VQA RESULTS

| Skill                                                             | Error Rate | Example                                                                                                                                                                                                                                                                                                                                                                                                                                                                                                                                                                                                                                                                                                                                                                                                                                                                                                                                                                                                                                    |
|-------------------------------------------------------------------|------------|--------------------------------------------------------------------------------------------------------------------------------------------------------------------------------------------------------------------------------------------------------------------------------------------------------------------------------------------------------------------------------------------------------------------------------------------------------------------------------------------------------------------------------------------------------------------------------------------------------------------------------------------------------------------------------------------------------------------------------------------------------------------------------------------------------------------------------------------------------------------------------------------------------------------------------------------------------------------------------------------------------------------------------------------|
| use-punnett-squares-to-calculate-ratios-of-offspring-types        | 69.10%     | <p>Description: This passage describes the antenna type trait in fruit flies: Most fruit flies have a pair of antennae on their head. But, some flies appear to have an extra pair of legs on their head instead! These flies have a mutation, or change, in a gene that affects body development. This mutation makes the cells in the fly's head form mutated antennae that are like legs. In a group of fruit flies, some individuals have mutated antennae and others have normal antennae. In this group, the gene for the antenna type trait has two alleles. The allele for normal antennae (a) is recessive to the allele for mutated antennae (A). This Punnett square shows a cross between two fruit flies. What is the expected ratio of offspring with normal antennae to offspring with mutated antennae? Choose the most likely ratio.</p>  <p>Picture:<br/>Choices: [0/4, 3/1, 2/2, 1/3, 4/0, ]<br/>Answer index: 0<br/>Prediction: 3</p> |
| use-punnett-squares-to-calculate-probabilities-of-offspring-types | 60.10%     | <p>Description: In a group of tomato plants, some individuals have smooth fruit and others have fuzzy fruit. In this group, the gene for the fruit texture trait has two alleles. The allele for smooth fruit (F) is dominant over the allele for fuzzy fruit (f). This Punnett square shows a cross between two tomato plants. What is the probability that a tomato plant produced by this cross will be homozygous recessive for the fruit texture gene?</p>  <p>Picture:<br/>Choices: [0/4, 1/4, 2/4, 3/4, 4/4, ]<br/>Answer index: 0<br/>Prediction: 3</p>                                                                                                                                                                                                                                                                                                                                                                                           |
| predict-temperature-changes                                       | 55.00%     | <p>Description: Two identical blocks are heated to different temperatures. The blocks are placed so that they touch, and heat begins to flow between the blocks. The pair of blocks is insulated, so no energy escapes. Later, the temperature of each block is measured again. Which pair of temperatures is possible?</p>  <p>Picture:<br/>Choices:<br/>Answer index: 1<br/>Prediction: 0</p>                                                                                                                                                                                                                                                                                                                                                                                                                                                                                                                                                        |
| identify-magnets-that-attract-or-repel                            | 21.10%     | <p>Description: Two magnets are placed as shown. Hint: Magnets that attract pull together. Magnets that repel push apart.</p>  <p>Picture:<br/>Choices: [attract, repel, ]<br/>Answer index: 1<br/>Prediction: 0</p>                                                                                                                                                                                                                                                                                                                                                                                                                                                                                                                                                                                                                                                                                                                                   |
| predict-heat-flow                                                 | 16.20%     | <p>Description: Two solid blocks are at different temperatures. The blocks are touching. Which picture shows how heat will move?</p>  <p>Picture: None<br/>Choices:<br/>Answer index: 0<br/>Prediction: 1</p>                                                                                                                                                                                                                                                                                                                                                                                                                                                                                                                                                                                                                                                                                                                                          |

Table 7: Error analysis of top-5 skills with most errors on science.



Table 8: Comparison between models and humans.

| Method        | Exam Score |             |      |            | Accuracy |            |             |      |      |
|---------------|------------|-------------|------|------------|----------|------------|-------------|------|------|
|               | Science    | Engineering | Math | Technology | Science  | Technology | Engineering | Math |      |
| Human         | 90.0       | 90.0        | 90.0 | 68.6       | 90.7     | 62.9       | 86.4        | 92.1 |      |
| Random        | 26.7       | 16.1        | 51.1 | 25.0       | 38.3     | 25.0       | 40.0        | 36.8 |      |
| GPT-3         | 45.7       | 50.2        | 51.4 | 22.1       | 48.4     | 21.3       | 65.2        | 42.4 |      |
| GPT-3.5-Turbo | 48.9       | 58.7        | 53.5 | 26.3       | 48.5     | 27.4       | 62.5        | 40.6 |      |
| CLIP          | Zero-Shot  | 33.9        | 19.0 | 52.9       | 68.7     | 53.8       | 60.7        | 65.5 | 44.3 |
|               | Few-Shot   | 39.1        | 43.9 | 67.6       | 70.9     | 77.3       | 59.7        | 55.5 | 67.8 |
|               | Finetuning | 57.8        | 37.4 | 75.7       | 71.9     | 91.9       | 62.6        | 60.3 | 83.5 |
|               | Multi-Task | 61.9        | 50.3 | 72.0       | 60.4     | 90.9       | 50.6        | 70.2 | 82.5 |

Table 9: Examples for different prompts and their zero-shot accuracy.

| Prompt Format                   | Example                                                                     | Science | Technology | Engineering | Math | Average |
|---------------------------------|-----------------------------------------------------------------------------|---------|------------|-------------|------|---------|
| Q+A                             | Which property matches this object? Rough.                                  | 50.3    | 68.7       | 55.1        | 43.6 | 54.4    |
| A+Q                             | Rough. Which property matches this object?                                  | 50.0    | 66.0       | 49.6        | 43.2 | 52.2    |
| Q "Choose the best answer:" A   | Which property matches this object? <b>Choose the best answer:</b> Rough.   | 50.1    | 70.7       | 49.7        | 44.2 | 53.7    |
| "Answer the question:" Q + A    | <b>Answer the question:</b> Which property matches this object? Rough.      | 49.4    | 67.6       | 51.0        | 43.6 | 52.9    |
| A "best answers the question" Q | Rough <b>best answers the question:</b> Which property matches this object? | 49.7    | 69.5       | 50.8        | 43.8 | 53.4    |

We evaluate the zero-shot CLIP model and models finetuned on each subject on the VQA (Antol et al., 2015) dataset. Results are shown in Table 11. The average increase of the finetuned models over the zero-shot setting is 1.2%.

| Model                       | Accuracy |
|-----------------------------|----------|
| Zero-Shot CLIP              | 24.7%    |
| Finetuning with Science     | 27.3%    |
| Finetuning with Technology  | 26.5%    |
| Finetuning with Engineering | 24.8%    |
| Finetuning with Math        | 24.9%    |

## C ADDITIONAL RELATED WORK

In addition to vision-language foundation models included in the main text, we expand the discussion to some recent models, including BLIP-2 (Li et al., 2023), EVA-CLIP (Sun et al., 2023), and KOSMOS-2 (Peng et al., 2023). BLIP-2 provides a versatile and efficient strategy for pre-training. This strategy enhances the vision-language pre-training process by utilizing frozen pre-trained image encoders and frozen large language models, while EVA-CLIP proposes a series of methods to increase the training efficiency of the CLIP model. KOSMOS-2 enables new capabilities for perceiving object descriptions. This work focuses on the creation of a dataset to evaluate the multimodal STEM understanding and we chose the foundation models like CLIP for a pilot study on our dataset. There are more benchmarks targeting formal math reasoning (Zheng et al., 2022; Liu et al., 2023; Xiong et al., 2023b), however, they are all restricted to single text modality and they can not evaluate fundamental skills.

Table 11: Results on the VQA (Antol et al., 2015) dataset.

## D SUMMARY OF SKILLS

We list all skills in STEM in Table 18 to 20 and show some examples in Table 21 to 27.

| Subject                                                | Grade/Skill                                                                           | Random                                                 | Zero-shot | Finetune |     |
|--------------------------------------------------------|---------------------------------------------------------------------------------------|--------------------------------------------------------|-----------|----------|-----|
| Science                                                | grade-2/classify-matter-as-solid-liquid-or-gas                                        | 28                                                     | 40        | 100      |     |
|                                                        | grade-2/identify-animals-with-and-without-backbones                                   | 0                                                      | 70        | 70       |     |
|                                                        | grade-2/identify-mammals-birds-fish-reptiles-and-amphibians                           | 0                                                      | 0         | 18       |     |
|                                                        | grade-2/identify-materials-in-objects                                                 | 21                                                     | 40        | 100      |     |
|                                                        | grade-2/identify-properties-of-an-object                                              | 35                                                     | 65        | 65       |     |
|                                                        | grade-3/compare-strengths-of-magnetic-forces                                          | 0                                                      | 18        | 63       |     |
|                                                        | grade-3/describe-ecosystems                                                           | 65                                                     | 50        | 100      |     |
|                                                        | grade-3/find-evidence-of-changes-to-earths-surface                                    | 17                                                     | 38        | 100      |     |
|                                                        | grade-3/identify-ecosystems                                                           | 35                                                     | 100       | 100      |     |
|                                                        | grade-3/identify-minerals-using-properties                                            | 35                                                     | 11        | 35       |     |
|                                                        | grade-4/compare-properties-of-objects                                                 | 10                                                     | 17        | 20       |     |
|                                                        | grade-4/describe-ecosystems                                                           | 74                                                     | 100       | 100      |     |
|                                                        | grade-4/identify-minerals-using-properties                                            | 35                                                     | 16        | 35       |     |
|                                                        | grade-4/use-evidence-to-classify-mammals-birds-fish-reptiles-and-amphibians           | 26                                                     | 35        | 35       |     |
|                                                        | grade-5/animal-adaptations-beaks-mouths-and-necks                                     | 17                                                     | 27        | 35       |     |
|                                                        | grade-5/classify-elementary-substances-and-compounds-using-models                     | 75                                                     | 75        | 75       |     |
|                                                        | grade-5/compare-ancient-and-modern-organisms-use-observations-to-support-a-hypothesis | 32                                                     | 32        | 50       |     |
|                                                        | grade-5/identify-directions-of-forces                                                 | 0                                                      | 26        | 35       |     |
|                                                        | grade-5/identify-the-photosynthetic-organism                                          | 0                                                      | 0         | 100      |     |
|                                                        | grade-5/predict-temperature-changes                                                   | 0                                                      | 22        | 0        |     |
|                                                        | grade-5/use-evidence-to-classify-animals                                              | 35                                                     | 35        | 35       |     |
|                                                        | grade-5/use-evidence-to-classify-mammals-birds-fish-reptiles-and-amphibians           | 18                                                     | 35        | 35       |     |
|                                                        | grade-5/weather-and-climate-around-the-world                                          | 60                                                     | 36        | 60       |     |
|                                                        | grade-6/compare-concentrations-of-solutions                                           | 15                                                     | 11        | 100      |     |
|                                                        | grade-6/describe-the-effects-of-gene-mutations-on-organisms                           | 52                                                     | 13        | 69       |     |
|                                                        | grade-6/diffusion-across-membranes                                                    | 50                                                     | 25        | 50       |     |
|                                                        | grade-7/describe-the-effects-of-gene-mutations-on-organisms                           | 42                                                     | 13        | 69       |     |
|                                                        | grade-8/classify-symbiotic-relationships                                              | 25                                                     | 36        | 45       |     |
|                                                        | grade-8/diffusion-across-membranes                                                    | 0                                                      | 18        | 35       |     |
|                                                        | grade-8/moss-and-fern-life-cycles                                                     | 0                                                      | 12        | 0        |     |
|                                                        | Engineer                                                                              | grade-6/evaluate-tests-of-engineering-design-solutions | 0         | 0        | 100 |
|                                                        |                                                                                       | grade-6/identify-control-and-experimental-groups       | 0         | 0        | 0   |
|                                                        |                                                                                       | grade-6/identify-independent-and-dependent-variables   | 0         | 0        | 100 |
| grade-6/identify-the-experimental-question             |                                                                                       | 30                                                     | 30        | 30       |     |
| grade-7/evaluate-tests-of-engineering-design-solutions |                                                                                       | 0                                                      | 0         | 0        |     |
| grade-7/identify-control-and-experimental-groups       |                                                                                       | 0                                                      | 0         | 40       |     |
| grade-7/identify-independent-and-dependent-variables   |                                                                                       | 0                                                      | 0         | 30       |     |
| grade-7/identify-the-experimental-question             |                                                                                       | 40                                                     | 0         | 40       |     |
| grade-8/identify-control-and-experimental-groups       |                                                                                       | 0                                                      | 0         | 0        |     |
| grade-8/identify-the-experimental-question             |                                                                                       | 60                                                     | 0         | 40       |     |
| grade-5/identify-laboratory-tools                      |                                                                                       | 21                                                     | 42        | 31       |     |
| grade-6/identify-laboratory-tools                      |                                                                                       | 21                                                     | 21        | 21       |     |
| grade-6/laboratory-safety-equipment                    |                                                                                       | 24                                                     | 65        | 52       |     |
| grade-7/laboratory-safety-equipment                    |                                                                                       | 10                                                     | 28        | 21       |     |
| grade-8/laboratory-safety-equipment                    |                                                                                       | 9                                                      | 58        | 52       |     |
| grade-8/laboratory-safety-equipment                    |                                                                                       | 49                                                     | 21        | 21       |     |
| grade-8/laboratory-safety-equipment                    | 9                                                                                     | 58                                                     | 58        |          |     |
| Math                                                   | algebra-2/factor-quadratics-using-algebra-tiles                                       | 40                                                     | 51        | 55       |     |
|                                                        | algebra-2/outliers-in-scatter-plots                                                   | 55                                                     | 47        | 97       |     |
|                                                        | calculus/determine-continuity-using-graphs                                            | 36                                                     | 63        | 80       |     |
|                                                        | calculus/find-limits-at-vertical-asymptotes-using-graphs                              | 60                                                     | 65        | 85       |     |
|                                                        | grade-1/subtraction-sentences-up-to-10-which-model-matches                            | 50                                                     | 30        | 99       |     |
|                                                        | grade-2/identify-halves-thirds-and-fourths                                            | 65                                                     | 75        | 97       |     |
|                                                        | grade-2/identify-lines-of-symmetry                                                    | 70                                                     | 64        | 99       |     |
|                                                        | grade-2/interpret-bar-graphs-ii                                                       | 14                                                     | 23        | 12       |     |
|                                                        | grade-2/ordinal-numbers-up-to-10th                                                    | 32                                                     | 61        | 28       |     |
|                                                        | grade-3/compare-fractions-in-recipes                                                  | 55                                                     | 50        | 68       |     |
|                                                        | grade-3/identify-parallelgrams                                                        | 51                                                     | 64        | 70       |     |
|                                                        | grade-3/is-it-a-polygon                                                               | 71                                                     | 60        | 98       |     |
|                                                        | grade-3/parallel-sides-in-quadrilaterals                                              | 29                                                     | 66        | 45       |     |
|                                                        | grade-4/nets-of-three-dimensional-figures                                             | 68                                                     | 40        | 99       |     |
|                                                        | grade-5/nets-of-three-dimensional-figures                                             | 53                                                     | 40        | 99       |     |
|                                                        | grade-6/changes-in-mean-median-mode-and-range                                         | 38                                                     | 14        | 15       |     |
|                                                        | grade-6/classify-triangles                                                            | 47                                                     | 38        | 45       |     |
|                                                        | grade-6/identify-polyhedra                                                            | 75                                                     | 75        | 75       |     |
|                                                        | grade-6/mean-median-mode-and-range-find-the-missing-number                            | 55                                                     | 41        | 99       |     |
|                                                        | grade-6/model-and-solve-equations-using-algebra-tiles                                 | 36                                                     | 36        | 57       |     |
|                                                        | grade-6/rational-numbers-find-the-sign                                                | 31                                                     | 78        | 99       |     |
|                                                        | grade-6/rotational-symmetry                                                           | 62                                                     | 56        | 78       |     |
|                                                        | grade-6/similar-and-congruent-figures                                                 | 34                                                     | 33        | 46       |     |
|                                                        | grade-6/which-figure-is-being-described                                               | 36                                                     | 27        | 86       |     |
|                                                        | grade-7/rational-numbers-find-the-sign                                                | 47                                                     | 58        | 99       |     |
|                                                        | grade-8/rotational-symmetry-amount-of-rotation                                        | 47                                                     | 32        | 63       |     |
|                                                        | kindergarten/count-on-ten-frames-up-to-10                                             | 15                                                     | 2         | 49       |     |
|                                                        | kindergarten/fewer-and-more-up-to-20                                                  | 80                                                     | 62        | 97       |     |
|                                                        | kindergarten/subtraction-sentences-up-to-5-which-model-matches                        | 41                                                     | 30        | 96       |     |
|                                                        | pre-k/addition-sentences-up-to-10-which-model-matches                                 | 60                                                     | 55        | 96       |     |
|                                                        | pre-k/count-on-ten-frames-up-to-3                                                     | 84                                                     | 50        | 51       |     |
|                                                        | pre-k/fewer-and-more-compare-by-matching                                              | 63                                                     | 52        | 90       |     |
|                                                        | pre-k/one-less-with-pictures-up-to-10                                                 | 61                                                     | 37        | 66       |     |
|                                                        | pre-k/one-more-with-pictures-up-to-5                                                  | 48                                                     | 36        | 75       |     |
|                                                        | pre-k/shapes-of-everyday-objects                                                      | 67                                                     | 96        | 96       |     |
|                                                        | pre-k/spheres                                                                         | 67                                                     | 96        | 96       |     |
|                                                        | pre-k/triangles                                                                       | 57                                                     | 75        | 75       |     |
|                                                        | pre-k/what-comes-next                                                                 | 75                                                     | 56        | 70       |     |
|                                                        | pre-k/ordinal-numbers-up-to-tenth                                                     | 27                                                     | 84        | 82       |     |
|                                                        | kindergarten/are-there-enough                                                         | 40                                                     | 99        | 96       |     |

Table 10: Exam scores for each skill.

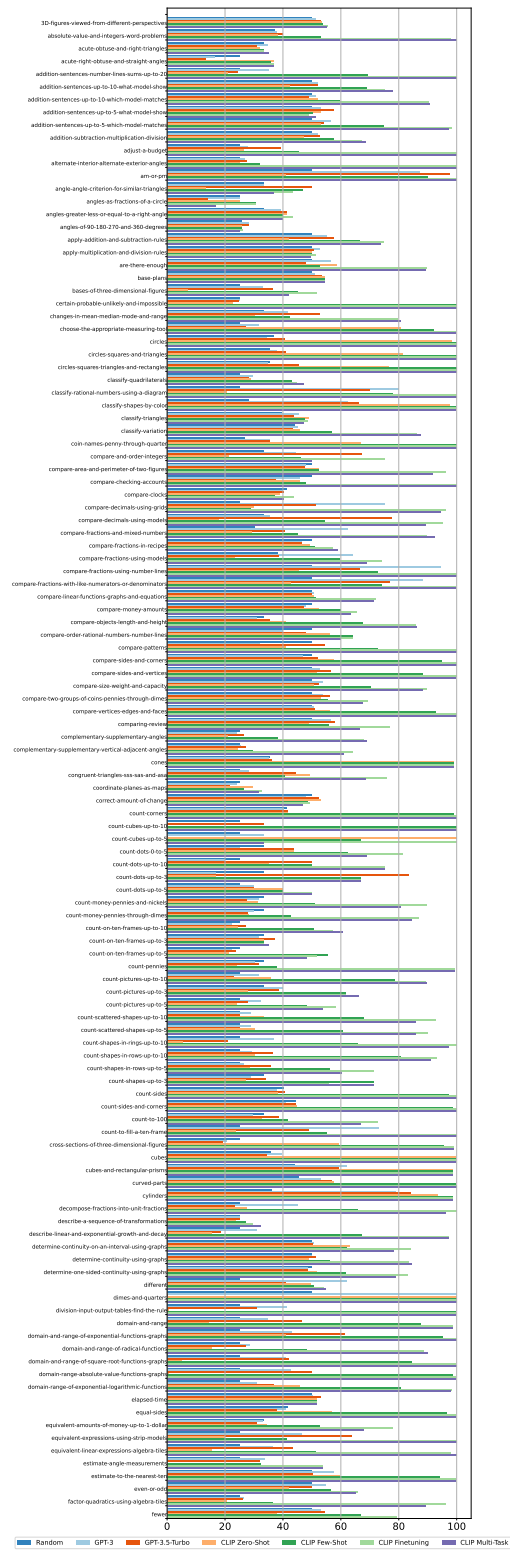

Figure 23: Accuracy per skill on math (part 1).

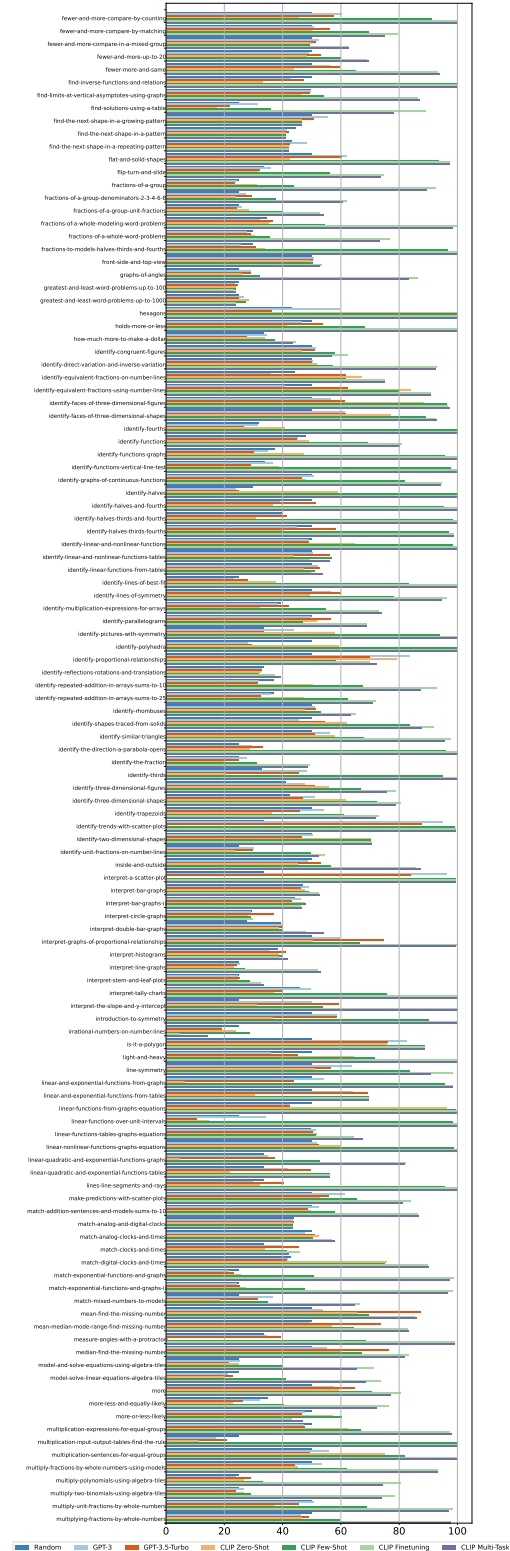

Figure 24: Accuracy per skill on math (part 2).

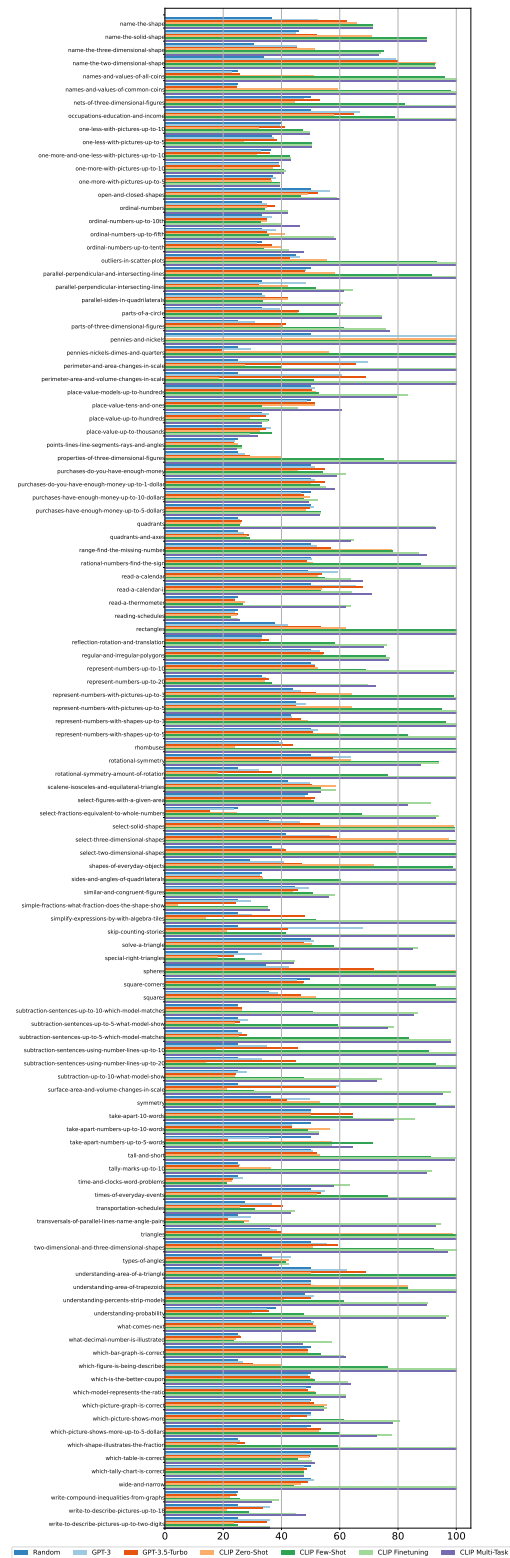

Figure 25: Accuracy per skill on math (part 3).

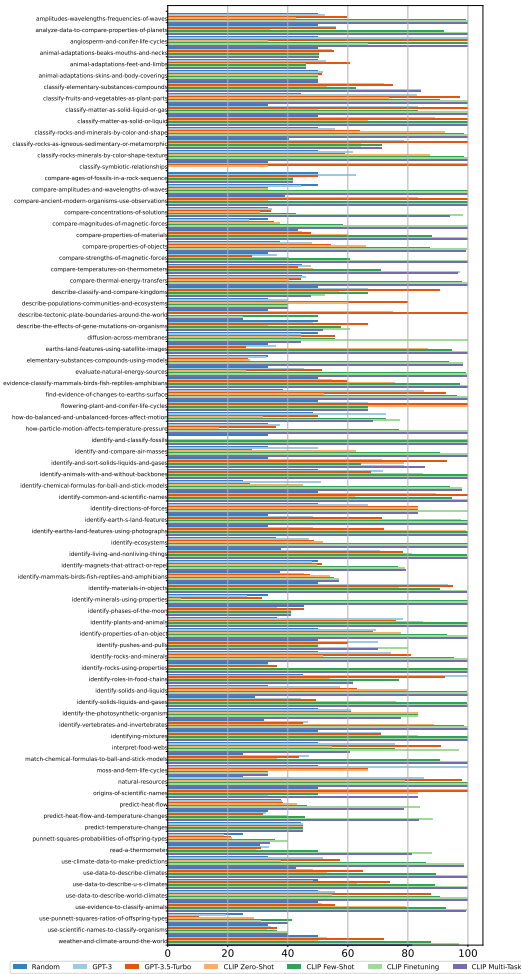

Figure 26: Accuracy per skill on science.

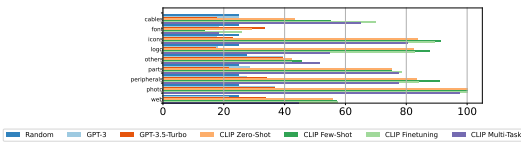

Figure 27: Accuracy per skill on technology.

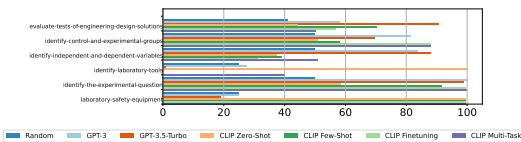

Figure 28: Accuracy per skill on engineering.

|                                                                                                                                                                                                                                                                                                                              |                                                                                                                                                                                                                                                                                                                                                                    |
|------------------------------------------------------------------------------------------------------------------------------------------------------------------------------------------------------------------------------------------------------------------------------------------------------------------------------|--------------------------------------------------------------------------------------------------------------------------------------------------------------------------------------------------------------------------------------------------------------------------------------------------------------------------------------------------------------------|
| <p>Subject: Technology<br/>Description: This is (an old) logo of which famous app or program?</p>  <p>Picture:<br/>Choices: [Microsoft Office Outlook, Microsoft Office OneDrive, OfficeSuite Pro, <b>Opera</b>, ]<br/>Answer index: 3</p>  | <p>Subject: Technology<br/>Description: What kind of computer component do you see here?</p>  <p>Picture:<br/>Choices: [TV Tuner Card, PC Card, <b>Motherboard</b>, Modem Card, ]<br/>Answer index: 2</p>                                                                         |
| <p>Subject: Technology<br/>Description: This is (part of) a (former) logo of which computer related brand?</p>  <p>Picture:<br/>Choices: [ASRock, Amiga Inc., Arctic, <b>ATI Technologies</b>, ]<br/>Answer index: 3</p>                    | <p>Subject: Technology<br/>Description: This is (part of) a (former) logo of which computer related brand?</p>  <p>Picture:<br/>Choices: [Fujitsu, Samsung, <b>Iiyama</b>, Brother, ]<br/>Answer index: 2</p>                                                                     |
| <p>Subject: technology<br/>Description: This is (part of) a (former) logo of which computer related brand?</p>  <p>Picture:<br/>Choices: [Xiaomi, Cisco, Intel, <b>Wii</b>, ]<br/>Answer index: 3</p>                                       | <p>Subject: Technology<br/>Description: What kind of computer component do you see here?</p>  <p>Picture:<br/>Choices: [Display Adapter/Video Card, PC Card, Power Supply Unit, <b>Hard Disk Drive</b>, ]<br/>Answer index: 3</p>                                                 |
| <p>Subject: Technology<br/>Description: What meaning or function is usually associated with this web interface symbol?</p>  <p>Picture:<br/>Choices: [Paste, Search, <b>Tip/Idea</b>, Calendar/Event, ]<br/>Answer index: 2</p>             | <p>Subject: Technology<br/>Description: This is (an old) logo of which famous app or program?</p>  <p>Picture:<br/>Choices: [YouTube Music, Beats Music, <b>MX Player</b>, YouTube, ]<br/>Answer index: 2</p>                                                                     |
| <p>Subject: Technology<br/>Description: What kind of computer related plug or port do you see here?</p>  <p>Picture:<br/>Choices: [<b>USB type-C plug</b>, DVI plug (type D), HDMI plug, 3.5mm Audio Cable plug, ]<br/>Answer index: 0</p> | <p>Subject: Technology<br/>Description: Identify this font type</p> <p><b>ActionQuiz</b></p> <p>Picture:<br/>Choices: [Lucida MT, News Gothic MT, <b>Fixedsys</b>, Courier New, ]<br/>Answer index: 2</p>                                                                                                                                                          |
| <p>Subject: Technology<br/>Description: Identify this font type</p> <p><i>ActionQuiz</i></p> <p>Picture:<br/>Choices: [Commercial Script BT, Brush Script MT, Vivaldi D, <b>Shelley Volante BT</b>, ]<br/>Answer index: 3</p>                                                                                                | <p>Subject: Technology<br/>Description: Identify this font type</p> <p><b>ActionQuiz</b></p> <p>Picture:<br/>Choices: [Garamond, Times New Roman, Courier New, <b>Georgia</b>, ]<br/>Answer index: 3</p>                                                                                                                                                           |
| <p>Subject: Technology<br/>Description: This is (part of) a (former) logo of which computer related brand?</p>  <p>Picture:<br/>Choices: [BenQ, Lexmark, <b>Creative Technology</b>, Lenovo, ]<br/>Answer index: 2</p>                    | <p>Subject: Technology<br/>Description: Identify this font type</p> <p><b>ActionQuiz</b></p> <p>Picture:<br/>Choices: [Webdings, Courier, Impact, <b>System</b>, ]<br/>Answer index: 3</p>                                                                                                                                                                         |
| <p>Subject: Technology<br/>Description: Identify this font type</p> <p><b>ActionQuiz</b></p> <p>Picture:<br/>Choices: [<b>Serifa BT</b>, Stylus ITC, Calisto MT, Tempus Sans ITC, ]<br/>Answer index: 0</p>                                                                                                                  | <p>Subject: technology<br/>Description: What meaning or function is usually associated with this web interface symbol?</p>  <p>Picture:<br/>Choices: [Pin/Make something sticky, <b>Storage for deleted files</b>, Options/Settings, Print (preview), ]<br/>Answer index: 1</p> |
| <p>Subject: Technology<br/>Description: What meaning or function is usually associated with this web interface symbol?</p>  <p>Picture:<br/>Choices: [Zoom in, Help, Like something, <b>Link select</b>, ]<br/>Answer index: 3</p>        | <p>Subject: Technology<br/>Description: What meaning or function is usually associated with this web interface symbol?</p>  <p>Picture:<br/>Choices: [Apply, Options/Settings, <b>Reload/Refresh</b>, Download, ]<br/>Answer index: 2</p>                                       |
| <p>Subject: Technology<br/>Description: What type of video game console do you see here?</p>  <p>Picture:<br/>Choices: [Mattel Intellivision, Sega Master System, Magnavox Odyssey 2, <b>Atari 5200</b>, ]<br/>Answer index: 3</p>        | <p>Subject: Technology<br/>Description: What meaning or function is usually associated with this web interface symbol?</p>  <p>Picture:<br/>Choices: [<b>Find</b>, Delete, Attachment, Calendar/Event, ]<br/>Answer index: 0</p>                                                |

Table 12: Human evaluation problem set (part 1).

|                                                                                                                                                                                                                                                                                                                                                                                                                                                                                                                                                                                                                                                                                                                                                                                                                                                                                                                                                                                                                                                                                                                                                                                          |                                                                                                                                                                                                                                                                                                                                                                                                                                                                                                                                                                                                                                                                                                                                                                                                                                                                                                                                                              |
|------------------------------------------------------------------------------------------------------------------------------------------------------------------------------------------------------------------------------------------------------------------------------------------------------------------------------------------------------------------------------------------------------------------------------------------------------------------------------------------------------------------------------------------------------------------------------------------------------------------------------------------------------------------------------------------------------------------------------------------------------------------------------------------------------------------------------------------------------------------------------------------------------------------------------------------------------------------------------------------------------------------------------------------------------------------------------------------------------------------------------------------------------------------------------------------|--------------------------------------------------------------------------------------------------------------------------------------------------------------------------------------------------------------------------------------------------------------------------------------------------------------------------------------------------------------------------------------------------------------------------------------------------------------------------------------------------------------------------------------------------------------------------------------------------------------------------------------------------------------------------------------------------------------------------------------------------------------------------------------------------------------------------------------------------------------------------------------------------------------------------------------------------------------|
| <p>Subject: Engineer<br/>Description: Select the gloves.<br/>Picture: None</p>  <p>Choices:<br/>Answer index: 0</p>                                                                                                                                                                                                                                                                                                                                                                                                                                                                                                                                                                                                                                                                                                                                                                                                                                                                                                                                                                                     | <p>Subject: Engineer<br/>Description: Iption: In this experiment, which were part of an experimental group? The passage below describes an experiment. Lucy and Erik were taking a snowboarding class. During the class, their instructor said they would go faster if they applied wax to the undersides of their snowboards. After the class, Lucy applied a thin layer of wax to the underside of a snowboard and rode the board straight down a hill. Then, she removed the wax and rode the snowboard straight down the hill again. Erik timed how long each ride took. Lucy repeated these rides on four other snowboards, alternating whether she first rode with or without wax.</p>  <p>Picture:<br/>Choices: [the snowboards with wax removed, the snowboards with wax added, ]<br/>Answer index: 1</p>                                                           |
| <p>Subject: Engineer<br/>Description: Select the test tube.<br/>Picture: None</p>  <p>Choices:<br/>Answer index: 2</p>                                                                                                                                                                                                                                                                                                                                                                                                                                                                                                                                                                                                                                                                                                                                                                                                                                                                                                                                                                                  | <p>Subject: Engineer<br/>Description: Select the funnel.<br/>Picture: None</p>  <p>Choices:<br/>Answer index: 2</p>                                                                                                                                                                                                                                                                                                                                                                                                                                                                                                                                                                                                                                                                                                                                                        |
| <p>Subject: Engineer<br/>Description: Select the round-bottom flask.<br/>Picture: None</p>  <p>Choices:<br/>Answer index: 1</p>                                                                                                                                                                                                                                                                                                                                                                                                                                                                                                                                                                                                                                                                                                                                                                                                                                                                                                                                                                        | <p>Subject: Engineer<br/>Description: Iption: In this experiment, which were part of an experimental group? The passage below describes an experiment. Kimberly grew roses for a flower shop. One day, she noticed tumor-like growths on her rose stems. She could tell that the plants had crown gall disease, which is caused by a type of bacteria. She knew that allicin, a chemical in garlic, can kill bacteria. Kimberly wondered if spraying her plants with garlic juice would prevent more tumors from forming on her plants. Once a day, Kimberly sprayed garlic juice on ten infected plants and left another 10 infected plants unsprayed. After one month, she compared the number of new tumors on plants in the two groups.</p>  <p>Picture:<br/>Choices: [the roses sprayed with garlic juice, the roses that were not sprayed, ]<br/>Answer index: 0</p> |
| <p>Subject: Engineer<br/>Description: Iption: Which of the following could Kendra's test show? Wind turbines use wind power to produce electricity. Kendra was a materials engineer who designed wind turbines. She wanted to design a new turbine that would produce 10% more electricity than older wind turbines. She thought that a turbine made from lightweight material would turn more easily and produce more electricity. So, Kendra created a computer model of a turbine made from lightweight material. Then she used the model to calculate how much more electricity the new turbine could produce compared to the older turbines. The passage below describes how the engineering-design process was used to test a solution to a problem. Read the passage. Then answer the question below.</p>  <p>Picture:<br/>Choices: [how much the new turbine would weigh, whether the new turbine could produce 10% more electricity, if the new turbine could turn easily, ]<br/>Answer index: 1</p>                                                                                         | <p>Subject: Engineer<br/>Description: Iption: In this experiment, which were part of an experimental group? The passage below describes an experiment. Isaac and his friend Belle flew nylon kites on the beach. They wondered if putting a tail on a kite would affect how well the kite flew. Isaac flew a kite that did not have a tail for five minutes. Then, he attached a four-foot-long tail and flew the kite for five more minutes. Isaac repeated this with three similar kites, alternating whether he started the kite with or without a tail. During each flight, Belle counted the number of times the kite crashed to the ground.</p>  <p>Picture:<br/>Choices: [the kites without tails, the kites with tails, ]<br/>Answer index: 1</p>                                                                                                                 |
| <p>Subject: Engineer<br/>Description: Iption: Identify the question that Bryant and Lamar's experiment can best answer. The passage below describes an experiment. Read the passage and then follow the instructions below. Bryant placed a ping pong ball in a catapult, pulled the catapult's arm back to a 45° angle, and launched the ball. Then, Bryant launched another ping pong ball, this time pulling the catapult's arm back to a 30° angle. With each launch, his friend Lamar measured the distance between the catapult and the place where the ball hit the ground. Bryant and Lamar repeated the launches with ping pong balls in four more identical catapults. They compared the distances the balls traveled when launched from a 45° angle to the distances the balls traveled when launched from a 30° angle.</p>  <p>Picture:<br/>Choices: [Do ping pong balls stop rolling along the ground sooner after being launched from a 30° angle or a 45° angle?, Do ping pong balls travel farther when launched from a 30° angle compared to a 45° angle?, ]<br/>Answer index: 1</p> | <p>Subject: Engineer<br/>Description: Select the Erlenmeyer flask.<br/>Picture: None</p>  <p>Choices:<br/>Answer index: 3</p>                                                                                                                                                                                                                                                                                                                                                                                                                                                                                                                                                                                                                                                                                                                                            |

Table 13: Human evaluation problem set (part 2).

|                                                                                                                                                                                                                                                                                                                                                                                                                                                                                                                                                                                                                                                                                                                                                                                                                                                                                                                                                                                                                                                                                                                                                                              |                                                                                                                                                                                                                                                                                                                                                                                                                                                                                                                                                                                                                                                                                                                                                                                                                                                                                                                                                                                                                                                                                                                                                                                                                                                                                                      |
|------------------------------------------------------------------------------------------------------------------------------------------------------------------------------------------------------------------------------------------------------------------------------------------------------------------------------------------------------------------------------------------------------------------------------------------------------------------------------------------------------------------------------------------------------------------------------------------------------------------------------------------------------------------------------------------------------------------------------------------------------------------------------------------------------------------------------------------------------------------------------------------------------------------------------------------------------------------------------------------------------------------------------------------------------------------------------------------------------------------------------------------------------------------------------|------------------------------------------------------------------------------------------------------------------------------------------------------------------------------------------------------------------------------------------------------------------------------------------------------------------------------------------------------------------------------------------------------------------------------------------------------------------------------------------------------------------------------------------------------------------------------------------------------------------------------------------------------------------------------------------------------------------------------------------------------------------------------------------------------------------------------------------------------------------------------------------------------------------------------------------------------------------------------------------------------------------------------------------------------------------------------------------------------------------------------------------------------------------------------------------------------------------------------------------------------------------------------------------------------|
| <p>Subject: Engineer<br/>Description: iption: Which of the following could Ivan's test show? Ivan was a landscape architect who was hired to design a new city park. The city council wanted the park to have space for outdoor concerts and to have at least 20% of the park shaded by trees. Ivan thought the concert area should be at least 150 meters from the road so traffic noise didn't interrupt the music. He developed three possible designs for the park with the concert area in a different location in each design. Then, he tested each design by measuring the distance between the road and the concert area. The passage below describes how the engineering-design process was used to test a solution to a problem. Read the passage. Then answer the question below.</p>  <p>Picture:<br/>Choices: [if at least 20% of the park would be shaded by trees in each design, <b>which design would have the greatest distance between the concert area and the road</b>, which design would have the least traffic noise in the concert area. ]<br/>Answer index: 1</p> | <p>Subject: Engineer<br/>Description: Select the beaker.<br/>Picture: None</p>  <p>Choices:<br/>Answer index: 3</p>                                                                                                                                                                                                                                                                                                                                                                                                                                                                                                                                                                                                                                                                                                                                                                                                                                                                                                                                                                                                                                                                                                |
| <p>Subject: Engineer<br/>Description: iption: Identify the question that Zeke's experiment can best answer. The passage below describes an experiment. Read the passage and then follow the instructions below. Zeke divided 40 unripe bananas evenly among eight paper bags and sealed the bags. He poked 20 small holes in four of the bags and left the other four without holes. He kept the bags at room temperature for three days. Then, Zeke opened the bags and counted the number of brown spots on each banana. He compared the average number of brown spots on bananas from bags with holes to the average number of brown spots on bananas from bags without holes.</p>  <p>Picture:<br/>Choices: [Do bananas develop more brown spots if they are kept in bags with holes compared to bags without holes?. Do bananas develop more brown spots when they are kept at room temperature compared to in a cold refrigerator?. ]<br/>Answer index: 0</p>                                                                                                                         | <p>Subject: Engineer<br/>Description: iption: Hint: An independent variable is a variable whose effect you are investigating. A dependent variable is a variable that you measure. Which of the following was an independent variable in this experiment? The passage below describes an experiment. Read the passage and think about the variables that are described. Tyler designed an electric circuit to test how well different types of metal conduct electricity. The circuit included a battery, a light bulb, wires, and clips that could be attached to a sheet of metal. If the metal conducted electricity poorly, the light bulb would appear dim. If the metal conducted electricity well, the light bulb would appear bright. Tyler collected nine equally sized sheets of metal: three sheets of copper, three sheets of iron, and three sheets of aluminum. He used the clips to attach each metal sheet, one sheet at a time, to the circuit. For each sheet, Tyler used a light meter to measure how much light the bulb produced.</p>  <p>Picture:<br/>Choices: [the amount of light produced by the light bulb, <b>the type of metal sheet used in the circuit</b>. ]<br/>Answer index: 1</p> |
| <p>Subject: Engineer<br/>Description: iption: Identify the question that Devon's experiment can best answer. The passage below describes an experiment. Read the passage and then follow the instructions below. Devon poured four ounces of water into each of six glasses. Devon dissolved one tablespoon of salt in each of three glasses, and did not add salt to the other three. Then, Devon placed an egg in one glass and observed if the egg floated. She removed the egg and dried it. She repeated the process with the other five glasses, recording each time if the egg floated. Devon repeated this test with two more eggs and counted the number of times the eggs floated in fresh water compared to salty water.</p>  <p>Picture:<br/>Choices: [Does the amount of water in a glass affect whether eggs sink or float in the water?. <b>Are eggs more likely to float in fresh water or salty water?</b>. ]<br/>Answer index: 1</p>                                                                                                                                    | <p>Subject: Engineer<br/>Description: iption: Which of the following could Luke's test show? Luke had a cookie recipe that made soft, thick cookies. But he preferred crunchy cookies. Luke read that using different types of sugar affects how firm the cookies are. His recipe used both white and brown sugar, so he decided to see if the cookies would be crunchy if he didn't use any brown sugar. Luke baked a batch of cookies using his recipe, but he left out the brown sugar and doubled the amount of white sugar. He baked the cookies for the same amount of time as in his original recipe. After the cookies finished baking and cooling, he tried one to find out how firm it was. The passage below describes how the engineering-design process was used to test a solution to a problem. Read the passage. Then answer the question below.</p>  <p>Picture:<br/>Choices: [if cookies made with only white sugar were soft, if baking cookies for longer made them more crunchy, if cookies made with double the amount of brown sugar were crunchy. ]<br/>Answer index: 0</p>                                                                                                               |
| <p>Subject: Engineer<br/>Description: iption: Identify the question that Myra's experiment can best answer. The passage below describes an experiment. Read the passage and then follow the instructions below. Myra glued lids onto 16 cardboard shoe boxes of equal size. She painted eight of the boxes black and eight of the boxes white. Myra made a small hole in the side of each box and then stuck a thermometer partially into each hole so she could measure the temperatures inside the boxes. She placed the boxes in direct sunlight in her backyard. Two hours later, she measured the temperature inside each box. Myra compared the average temperature inside the black boxes to the average temperature inside the white boxes.</p>  <p>Picture:<br/>Choices: [Do the temperatures inside boxes depend on the sizes of the boxes?. <b>Do the insides of white boxes get hotter than the insides of black boxes when the boxes are left in the sun?</b>. ]<br/>Answer index: 1</p>                                                                                     | <p>Subject: Engineer<br/>Description: iption: Which of the following could Zoe and Evelyn's test show? Zoe and Evelyn were making batches of concrete for a construction project. To make the concrete, they mixed together dry cement powder, gravel, and water. Then, they checked if each batch was firm enough using a test called a slump test. They poured some of the fresh concrete into an upside-down metal cone. They left the concrete in the metal cone for 30 seconds. Then, they lifted the cone to see if the concrete stayed in a cone shape or if it collapsed. If the concrete in a batch collapsed, they would know the batch should not be used. The passage below describes how the engineering-design process was used to test a solution to a problem. Read the passage. Then answer the question below.</p>  <p>Picture:<br/>Choices: [if the concrete from each batch took the same amount of time to dry, if a new batch of concrete was firm enough to use. ]<br/>Answer index: 1</p>                                                                                                                                                                                                 |
| <p>Subject: Engineer<br/>Description: iption: Identify the question that Belle's experiment can best answer. The passage below describes an experiment. Read the passage and then follow the instructions below. Belle planted 25 tomato seeds one-half inch below the soil surface in each of six pots. Belle added an equal amount of fertilizer to three of the six pots. She placed the pots in a plant growth chamber where all the seeds experienced the same temperature, amount of light, and humidity level. After two weeks, Belle counted the number of seedlings that grew in each pot. She compared the number of seedlings in the pots with fertilizer to the number of seedlings in the pots without fertilizer.</p>  <p>Picture:<br/>Choices: [Do more tomato seedlings grow when they are planted in soil with fertilizer compared to soil without fertilizer?. Does the humidity level where tomato seeds are planted affect the number of tomato seedlings that grow?. ]<br/>Answer index: 0</p>                                                                       | <p>Subject: Engineer<br/>Description: iption: In this experiment, which were part of a control group? The passage below describes an experiment. After a severe winter storm, Sandeep's driveway was covered with ice. He read that salt makes ice melt at a lower temperature. Before covering his entire driveway with salt, he wanted to know if adding salt could actually help melt ice in the freezing outdoor temperatures. Sandeep weighed twenty ice cubes. He sprinkled salt on half of the ice cubes and left the other half unsalted. He placed all the ice cubes outside. One hour later, Sandeep quickly dried each ice cube and reweighed it to see how much it had melted.</p>  <p>Picture:<br/>Choices: [the salted ice cubes, <b>the unsalted ice cubes</b>. ]<br/>Answer index: 1</p>                                                                                                                                                                                                                                                                                                                                                                                                          |

Table 14: Human evaluation problem set (part 3).

|                                                                                                                                                                                                                                                                                                                                                                                                                                                                                                                                                                                                                                                                                                                                                                                                                                            |                                                                                                                                                                                                                                                                                                                                                                                                                                                                                                                                                                                                                                                                                            |
|--------------------------------------------------------------------------------------------------------------------------------------------------------------------------------------------------------------------------------------------------------------------------------------------------------------------------------------------------------------------------------------------------------------------------------------------------------------------------------------------------------------------------------------------------------------------------------------------------------------------------------------------------------------------------------------------------------------------------------------------------------------------------------------------------------------------------------------------|--------------------------------------------------------------------------------------------------------------------------------------------------------------------------------------------------------------------------------------------------------------------------------------------------------------------------------------------------------------------------------------------------------------------------------------------------------------------------------------------------------------------------------------------------------------------------------------------------------------------------------------------------------------------------------------------|
| <p>Subject: Science<br/>Description: Select the gray mineral.<br/>Picture: None</p>  <p>Choices:<br/>Answer index: 1</p>                                                                                                                                                                                                                                                                                                                                                                                                                                                                                                                                                                                                                                  | <p>Subject: Science<br/>Description: Select the one substance that is not a mineral.<br/>Picture: None</p>  <p>Choices:<br/>Answer index: 0</p>                                                                                                                                                                                                                                                                                                                                                                                                                                                          |
| <p>Subject: Science<br/>Description: iption: This organism is a spot-fin porcupinefish. Its scientific name is Diodon hystrix. Select the organism in the same genus as the spot-fin porcupinefish.<br/>Picture:</p>  <p>Choices:<br/>Answer index: 1</p>                                                                                                                                                                                                                                                                                                                                                                                                                                                                                                 | <p>Subject: Science<br/>Description: Select the liquid.<br/>Picture: None</p>  <p>Choices:<br/>Answer index: 3</p>                                                                                                                                                                                                                                                                                                                                                                                                                                                                                       |
| <p>Subject: Science<br/>Description: iption: Fish are a group of animals with similar traits. The following traits can be used to identify fish: They have fins, not limbs. They make eggs with no shells. Observe the animals and read the descriptions. Select the one animal that has all of the fish traits listed above. Brown pelicans live along the west coast of North America. They dive underwater to catch fish in their beaks. Brown pelicans keep their eggs warm by standing on the shells with their large, webbed feet. Salmon lay eggs with no shells at the bottom of freshwater streams. Salmon use their powerful fins to swim. They can even jump up small waterfalls!<br/>Picture: None</p>  <p>Choices:<br/>Answer index: 0</p> | <p>Subject: Science<br/>Description: iption: Two identical blocks are heated to different temperatures. The blocks are placed so that they touch each other. Heat can flow from one block to another but cannot escape from the blocks. Later, the temperature of each block is measured again. Which pair of temperatures is possible?<br/>Picture:</p>  <p>Choices:<br/>Answer index: 0</p>                                                                                                                                                                                                          |
| <p>Subject: Science<br/>Description: iption: Two solid blocks are heated to the temperatures shown. The blocks are placed so they touch. Which diagram shows the direction heat will flow?<br/>Picture: None</p>  <p>Choices:<br/>Answer index: 0</p>                                                                                                                                                                                                                                                                                                                                                                                                                                                                                                   | <p>Subject: Science<br/>Description: Select the plant.<br/>Picture: None</p>  <p>Choices:<br/>Answer index: 0</p>                                                                                                                                                                                                                                                                                                                                                                                                                                                                                      |
| <p>Subject: Science<br/>Description: iption: Use the data to answer the question below. Is the following statement about our solar system true or false? Of the four smallest planets, two are made mainly of gas.<br/>Picture:</p>  <p>Choices: [false, true, ]<br/>Answer index: 0</p>                                                                                                                                                                                                                                                                                                                                                                                                                                                                | <p>Subject: Science<br/>Description: iption: Think about the magnetic force between the magnets in each pair. Which of the following statements is true? The images below show two pairs of magnets. The magnets in different pairs do not affect each other. All the magnets shown are made of the same material, but some of them are different sizes.<br/>Picture:</p>  <p>Choices: [The magnitude of the magnetic force is smaller in Pair 2., The magnitude of the magnetic force is the same in both pairs., The magnitude of the magnetic force is smaller in Pair 1., ]<br/>Answer index: 0</p> |

Table 15: Human evaluation problem set (part 4).



|                                                                                                                                                                                                                                                                                                                                                                                                                                                                                                                                                                                                                                                                                                                                |                                                                                                                                                                                                                                                                                                                                                                                                                                                                      |
|--------------------------------------------------------------------------------------------------------------------------------------------------------------------------------------------------------------------------------------------------------------------------------------------------------------------------------------------------------------------------------------------------------------------------------------------------------------------------------------------------------------------------------------------------------------------------------------------------------------------------------------------------------------------------------------------------------------------------------|----------------------------------------------------------------------------------------------------------------------------------------------------------------------------------------------------------------------------------------------------------------------------------------------------------------------------------------------------------------------------------------------------------------------------------------------------------------------|
| <p>Subject: Science<br/>Description: iption: Think about the magnetic force between the magnets in each pair. Which of the following statements is true? The images below show two pairs of magnets. The magnets in different pairs do not affect each other. All the magnets shown are made of the same material.</p> <p>Picture: </p> <p>Choices: [The magnetic force is stronger in Pair 2., The magnetic force is stronger in Pair 1., The strength of the magnetic force is the same in both pairs., ]</p> <p>Answer index: 0</p>                                                                                                        | <p>Subject: Science<br/>Description: Select the gas.<br/>Picture: None</p> <p></p> <p>Choices: hammer bowling ball air inside a tire door</p> <p>Answer index: 2</p>                                                                                                                                                                                                               |
| <p>Subject: Science<br/>Description: Select the plant.<br/>Picture: None</p> <p></p> <p>Orchids can grow flowers. Elephants eat plants. Peregrine falcons walk and fly. Manta rays swim underwater.</p> <p>Choices: [orchids, elephant, peregrine falcon, manta ray, ]</p> <p>Answer index: 0</p>                                                                                                                                                                                                                                                                                                                                             | <p>Subject: Science<br/>Description: iption: Which property matches this object? Select the better answer.</p> <p></p> <p>Picture: gold ring</p> <p>Choices: [soft, smooth, ]</p> <p>Answer index: 1</p>                                                                                                                                                                            |
| <p>Subject: Science<br/>Description: iption: Select the animal that does not have a backbone. Hint: Insects, spiders, and worms do not have backbones.<br/>Picture: None</p> <p></p> <p>bull ant harvest mouse</p> <p>Choices: [ant, mouse, ]</p> <p>Answer index: 0</p>                                                                                                                                                                                                                                                                                                                                                                    | <p>Subject: Science<br/>Description: iption: The diagram below is a model of two solutions. Each green ball represents one particle of solute. Which solution has a higher concentration of green particles?</p> <p></p> <p>Picture: [Solution A, Solution B, ]</p> <p>Choices: [neither, their concentrations are the same, Solution A, Solution B, ]</p> <p>Answer index: 2</p> |
| <p>Subject: Science<br/>Description: iption: Two solid blocks are at different temperatures. The blocks are touching. Which picture shows how heat will move?<br/>Picture: None</p> <p></p> <p>Choices: [left to right, right to left, ]</p> <p>Answer index: 1</p>                                                                                                                                                                                                                                                                                                                                                                         | <p>Subject: Science<br/>Description: Select the chemical formula for this molecule.</p> <p></p> <p>Picture: [H2C, HCl, HC, HCl2, ]</p> <p>Choices: [H2C, HCl, HC, HCl2, ]</p> <p>Answer index: 1</p>                                                                                                                                                                              |
| <p>Subject: Science<br/>Description: iption: Which statement best describes the climate of Bangor? Hint: Summers in the Northern Hemisphere occur in June, July, and August. Winters in the Northern Hemisphere occur in December, January, and February. Bangor, Maine, is a city in the United States. It has a warm summer continental climate.</p> <p></p> <p>Picture: [Summers have higher temperatures and slightly more precipitation than winters., On average, On average, ]</p> <p>Choices: [Summers have higher temperatures and slightly more precipitation than winters., On average, On average, ]</p> <p>Answer index: 1</p> | <p>Subject: Science<br/>Description: Select the temperature shown by this thermometer.</p> <p></p> <p>Picture: [13°F, 61°F, 56°F, ]</p> <p>Choices: [13°F, 61°F, 56°F, ]</p> <p>Answer index: 2</p>                                                                                                                                                                               |

Table 16: Human evaluation problem set (part 5).

|                                                                                                                                                                                                                                                                                                                                                                                                                                                                                                                                                                         |                                                                                                                                                                                                                                                                                                                                                                                                                                                                                                                                                                                                                                                 |
|-------------------------------------------------------------------------------------------------------------------------------------------------------------------------------------------------------------------------------------------------------------------------------------------------------------------------------------------------------------------------------------------------------------------------------------------------------------------------------------------------------------------------------------------------------------------------|-------------------------------------------------------------------------------------------------------------------------------------------------------------------------------------------------------------------------------------------------------------------------------------------------------------------------------------------------------------------------------------------------------------------------------------------------------------------------------------------------------------------------------------------------------------------------------------------------------------------------------------------------|
| <p>Subject: Math<br/>Description: iption: This table shows Jason's January budget. What could Jason do to balance his budget?</p>  <p>Picture: </p> <p>Choices: [increase income from shoveling snow to 40, spend 15 less at Pizza Palace, spend only \$40 at the arcade, spend \$20 more on video games, ]</p> <p>Answer index: 2</p>                                                                | <p>Subject: Math<br/>Description: In solving this triangle, which law must you use first?</p>  <p>Picture: </p> <p>Choices: [Law of Cosines, Law of Sines, ]</p> <p>Answer index: 1</p>                                                                                                                                                                                                                                                                                       |
| <p>Subject: Math<br/>Description: Is this angle acute, right, obtuse, or straight?</p>  <p>Picture: </p> <p>Choices: [straight, obtuse, acute, right, ]</p> <p>Answer index: 1</p>                                                                                                                                                                                                                    | <p>Subject: Math<br/>Description: Look at this cube: If the side lengths are tripled, then which of the following statements about its volume will be true?</p>  <p>Picture: </p> <p>Choices: [The ratio of the new volume to the old volume will be 81:1., The ratio of the new volume to the old volume will be 1:8., The ratio of the new volume to the old volume will be 3:1., The ratio of the new volume to the old volume will be 27:1., ]</p> <p>Answer index: 3</p> |
| <p>Subject: Math<br/>Description: Which shape is a cone?</p>  <p>Picture: </p> <p>Choices: [ ]</p> <p>Answer index: 2</p>                                                                                                                                                                                                                                                                             | <p>Subject: Math<br/>Description: Is the function <math>f(x)</math> continuous on the open interval <math>(3,7)</math>?</p>  <p>Picture: </p> <p>Choices: [no, yes, ]</p> <p>Answer index: 1</p>                                                                                                                                                                                                                                                                              |
| <p>Subject: Math<br/>Description: iption: Use the diagram to help you answer the question below. Which of the following is a rational number but not an integer?</p>  <p>Picture: </p> <p>Choices: [-123, 83, 194, 6.53, ]</p> <p>Answer index: 3</p>                                                                                                                                                 | <p>Subject: Math<br/>Description: Is this polygon a trapezoid?</p>  <p>Picture: </p> <p>Choices: [no, yes, ]</p> <p>Answer index: 1</p>                                                                                                                                                                                                                                                                                                                                       |
| <p>Subject: Math<br/>Description: Look at the colored part of each shape. Which shape shows one-third?</p>  <p>Picture: </p> <p>Choices: [ ]</p> <p>Answer index: 0</p>                                                                                                                                                                                                                               | <p>Subject: Math<br/>Description: Which shape has 5 equal sides?</p>  <p>Picture: </p> <p>Choices: [ ]</p> <p>Answer index: 1</p>                                                                                                                                                                                                                                                                                                                                           |
| <p>Subject: Math<br/>Description: iption: Identify the cross section of this object. Assume objects are perpendicular if they appear so.</p>  <p>Picture: </p>  <p>Picture: </p> <p>Choices: [ ]</p> <p>Answer index: 0</p> | <p>Subject: Math<br/>Description: Are there more circles or triangles?</p>  <p>Picture: </p> <p>Choices: [circles, triangles, ]</p> <p>Answer index: 0</p>                                                                                                                                                                                                                                                                                                                |
| <p>Subject: Math<br/>Description: iption: Look at this shape: Which image shows a reflection?</p>  <p>Picture: </p> <p>Choices: [C, A, B, ]</p> <p>Answer index: 2</p>                                                                                                                                                                                                                            | <p>Subject: Math<br/>Description: Is the function <math>f(x)</math> continuous?</p>  <p>Picture: </p> <p>Choices: [no, yes, ]</p> <p>Answer index: 0</p>                                                                                                                                                                                                                                                                                                                  |
| <p>Subject: Math<br/>Description: An ice cream sundae costs 1 dollar and 41 cents. Do you have enough money to buy it?</p>  <p>Picture: </p> <p>Choices: [yes, no, ]</p> <p>Answer index: 0</p>                                                                                                                                                                                                   | <p>Subject: Math<br/>Description: Which shape has a triangle as a face?</p>  <p>Picture: </p> <p>Choices: [ ]</p> <p>Answer index: 1</p>                                                                                                                                                                                                                                                                                                                                |
| <p>Subject: Math<br/>Description: iption: Look at this figure: What is the shape of its bases?</p>  <p>Picture: </p> <p>Choices: [decagon, octagon, rectangle, circle, ]</p> <p>Answer index: 2</p>                                                                                                                                                                                               | <p>Subject: Math<br/>Description: The graph below shows a function. Is its inverse also a function?</p>  <p>Picture: </p> <p>Choices: [yes, no, ]</p> <p>Answer index: 0</p>                                                                                                                                                                                                                                                                                              |
| <p>Subject: Math<br/>Description: What is the range of this exponential function?</p>  <p>Picture: </p> <p>Choices: [<math>(-\infty, -3)</math>, <math>(-\infty, -2)</math>, <math>(-\infty, -1)</math>, all real numbers, <math>(-\infty, -3)</math>]</p> <p>Answer index: 0</p>                                                                                                                 | <p>Subject: Math<br/>Description: iption: Look at this graph: Is this relation a function?</p>  <p>Picture: </p> <p>Choices: [no, yes, ]</p> <p>Answer index: 1</p>                                                                                                                                                                                                                                                                                                       |

Table 17: Human evaluation problem set (part 6).

| Subject     | Grade                                                                                                                                                                                                                                                                                                                                                                                                                                                                                                                                                                                                                                                                                                                                                                                                                                                                                                                                                                                                                                                                                                                                                                         | Skills                                                                                                                                                                                                                                                                                                                                                                                                                                                                                                                                                                                                                                                                                                                                                                                                                                                                                                                                                                                                                                                                                                                                                                                                                                                                                                                                                                                                                                                                                                                                                                                                            |
|-------------|-------------------------------------------------------------------------------------------------------------------------------------------------------------------------------------------------------------------------------------------------------------------------------------------------------------------------------------------------------------------------------------------------------------------------------------------------------------------------------------------------------------------------------------------------------------------------------------------------------------------------------------------------------------------------------------------------------------------------------------------------------------------------------------------------------------------------------------------------------------------------------------------------------------------------------------------------------------------------------------------------------------------------------------------------------------------------------------------------------------------------------------------------------------------------------|-------------------------------------------------------------------------------------------------------------------------------------------------------------------------------------------------------------------------------------------------------------------------------------------------------------------------------------------------------------------------------------------------------------------------------------------------------------------------------------------------------------------------------------------------------------------------------------------------------------------------------------------------------------------------------------------------------------------------------------------------------------------------------------------------------------------------------------------------------------------------------------------------------------------------------------------------------------------------------------------------------------------------------------------------------------------------------------------------------------------------------------------------------------------------------------------------------------------------------------------------------------------------------------------------------------------------------------------------------------------------------------------------------------------------------------------------------------------------------------------------------------------------------------------------------------------------------------------------------------------|
| Science     | grade-2                                                                                                                                                                                                                                                                                                                                                                                                                                                                                                                                                                                                                                                                                                                                                                                                                                                                                                                                                                                                                                                                                                                                                                       | classify-fruits-and-vegetables-as-plant-parts, classify-matter-as-solid-liquid-or-gas, classify-matter-as-solid-or-liquid, classify-rocks-and-minerals-by-color-and-shape, compare-properties-of-materials, compare-properties-of-objects, compare-temperatures-on-thermometers, find-evidence-of-changes-to-earths-surface, identify-animals-with-and-without-backbones, identify-earth-s-land-features, identify-living-and-nonliving-things, identify-magnets-that-attract-or-repel, identify-mammals-birds-fish-reptiles-and-amphibians, identify-materials-in-objects, identify-plants-and-animals, identify-properties-of-an-object, identify-pushes-and-pulls, identify-solids-and-liquids, identify-solids-liquids-and-gases, identifying-mixtures, natural-resources, predict-heat-flow, read-a-thermometer                                                                                                                                                                                                                                                                                                                                                                                                                                                                                                                                                                                                                                                                                                                                                                                              |
|             | grade-3                                                                                                                                                                                                                                                                                                                                                                                                                                                                                                                                                                                                                                                                                                                                                                                                                                                                                                                                                                                                                                                                                                                                                                       | animal-adaptations-beaks-mouths-and-necks, animal-adaptations-feet-and-limbs, animal-adaptations-skins-and-body-coverings, classify-fruits-and-vegetables-as-plant-parts, classify-matter-as-solid-liquid-or-gas, classify-rocks-and-minerals-by-color-shape-and-texture, classify-rocks-as-igneous-sedimentary-or-metamorphic, compare-ancient-and-modern-organisms-use-observations-to-support-a-hypothesis, compare-properties-of-materials, compare-properties-of-objects, compare-strengths-of-magnetic-forces, compare-temperatures-on-thermometers, find-evidence-of-changes-to-earths-surface, how-do-balanced-and-unbalanced-forces-affect-motion, identify-earth-s-land-features, identify-ecosystems, identify-living-and-nonliving-things, identify-magnets-that-attract-or-repel, identify-mammals-birds-fish-reptiles-and-amphibians, identify-materials-in-objects, identify-minerals-using-properties, identify-plants-and-animals, identify-properties-of-an-object, identify-pushes-and-pulls, identify-rocks-using-photographs, identify-roles-in-food-chains, identify-solids-liquids-and-gases, identify-vertebrates-and-invertebrates, interpret-food-webs, natural-resources, predict-heat-flow, predict-temperature-changes, use-climate-data-to-make-predictions, use-data-to-describe-u-s-climates, use-data-to-describe-world-climates, weather-and-climate-around-the-world                                                                                                                                                                                                           |
|             | grade-4                                                                                                                                                                                                                                                                                                                                                                                                                                                                                                                                                                                                                                                                                                                                                                                                                                                                                                                                                                                                                                                                                                                                                                       | animal-adaptations-beaks-mouths-and-necks, animal-adaptations-feet-and-limbs, animal-adaptations-skins-and-body-coverings, classify-fruits-and-vegetables-as-plant-parts, classify-rocks-as-igneous-sedimentary-or-metamorphic, compare-amplitudes-and-wavelengths-of-waves, compare-ancient-and-modern-organisms-use-observations-to-support-a-hypothesis, compare-properties-of-materials, compare-properties-of-objects, compare-strengths-of-magnetic-forces, compare-temperatures-on-thermometers, describe-classify-and-compare-kingdoms, evaluate-natural-energy-sources, how-do-balanced-and-unbalanced-forces-affect-motion, identify-and-classify-fossils, identify-and-sort-solids-liquids-and-gases, identify-common-and-scientific-names, identify-directions-of-forces, identify-earth-land-features-using-photographs, identify-earth-land-features-using-satellite-images, identify-ecosystems, identify-living-and-nonliving-things, identify-magnets-that-attract-or-repel, identify-mammals-birds-fish-reptiles-and-amphibians, identify-minerals-using-properties, identify-phases-of-the-moon, identify-rocks-using-properties, identify-roles-in-food-chains, identify-vertebrates-and-invertebrates, interpret-food-web s, origins-of-scientific-names, predict-heat-flow, predict-temperature-changes, read-a-thermometer, use-climate-data-to-make-predictions, use-data-to-describe-climates, use-evidence-to-classify-animals s, use-evidence-to-classify-mammals-birds-fish-reptiles-and-amphibians, use-scientific-names-to-classify-organisms, weather-and-climate-around-the-world |
|             | grade-5                                                                                                                                                                                                                                                                                                                                                                                                                                                                                                                                                                                                                                                                                                                                                                                                                                                                                                                                                                                                                                                                                                                                                                       | animal-adaptations-beaks-mouths-and-necks, animal-adaptations-feet-and-limbs, animal-adaptations-skins-and-body-coverings, classify-elementary-substances-and-compounds-using-models, classify-fruits-and-vegetables-as-plant-parts, classify-rocks-as-igneous-sedimentary-or-metamorphic, compare-amplitudes-and-wavelengths-of-waves, compare-ancient-and-modern-organisms-use-observations-to-support-a-hypothesis, compare-magnitudes-of-magnetic-forces, compare-properties-of-objects, describe-classify-and-compare-kingdoms, evaluate-natural-energy-sources, flowering-plant-and-conifer-life-cycles, how-do-balanced-and-unbalanced-forces-affect-motion, identify-and-classify-fossils, identify-common-and-scientific-names, identify-directions-of-forces, identify-earth-land-features-using-photographs, identify-earth-land-features-using-satellite-images, identify-ecosystems, identify-living-and-nonliving-things, identify-magnets-that-attract-or-repel, identify-mammals-birds-fish-reptiles-and-amphibians, identify-phases-of-the-moon, identify-rocks-and-minerals, identify-roles-in-food-chains, identify-the-photosynthetic-organism, identify-vertebrates-and-invertebrates, match-chemical-formulas-to-ball-and-stick-models, moss-and-fern-life-cycles, origins-of-scientific-names, predict-heat-flow, predict-temperature-changes, use-data-to-describe-climates, use-evidence-to-classify-animals, use-evidence-to-classify-mammals-birds-fish-reptiles-and-amphibians, use-scientific-names-to-classify-organisms, weather-and-climate-around-the-world                      |
|             | grade-6                                                                                                                                                                                                                                                                                                                                                                                                                                                                                                                                                                                                                                                                                                                                                                                                                                                                                                                                                                                                                                                                                                                                                                       | analyze-data-to-compare-properties-of-planets, classify-elementary-substances-and-compounds-using-models, classify-rocks-as-igneous-sedimentary-or-metamorphic, classify-symbiotic-relationships, compare-ages-of-fossils-in-a-rock-sequence, compare-amplitudes-and-frequencies-of-waves, compare-concentrations-of-solutions, compare-magnitudes-of-magnetic-forces, compare-thermal-energy-transfers, describe-populations-communities-and-ecosystems, describe-tectonic-plate-boundaries-around-the-world, describe-the-effects-of-gene-mutations-on-organisms, diffusion-across-membranes, flowering-plant-and-conifer-life-cycles, identify-and-compare-air-masses, identify-common-and-scientific-names, identify-earth-land-features-using-photographs, identify-earth-land-features-using-satellite-images s, identify-ecosystems, identify-living-and-nonliving-things, identify-magnets-that-attract-or-repel, identify-mammals-birds-fish-reptiles-and-amphibians, identify-phases-of-the-moon, identify-rocks-and-minerals, identify-roles-in-food-chains, identify-the-photosynthetic-organism, identify-vertebrates-and-invertebrates, match-chemical-formulas-to-ball-and-stick-models, moss-and-fern-life-cycles, origins-of-scientific-names, predict-heat-flow-and-temperature-changes, use-data-to-describe-climates, use-scientific-names-to-classify-organisms, weather-and-climate-around-the-world                                                                                                                                                                                        |
|             | grade-7                                                                                                                                                                                                                                                                                                                                                                                                                                                                                                                                                                                                                                                                                                                                                                                                                                                                                                                                                                                                                                                                                                                                                                       | analyze-data-to-compare-properties-of-planets, angiosperm-and-conifer-life-cycles, classify-elementary-substances-and-compounds-using-models, classify-rocks-as-igneous-sedimentary-or-metamorphic, classify-symbiotic-relationships, compare-ages-of-fossils-in-a-rock-sequence, compare-amplitudes-and-frequencies-of-waves, compare-concentrations-of-solutions, compare-magnitudes-of-magnetic-forces, compare-thermal-energy-transfers, describe-populations-communities-and-ecosystems, describe-tectonic-plate-boundaries-around-the-world, describe-the-effects-of-gene-mutations-on-organisms, diffusion-across-membranes, identify-and-compare-air-masses, identify-chemical-formulas-for-ball-and-stick-models, identify-common-and-scientific-names, identify-ecosystems, identify-how-particle-motion-affects-temperature-and-pressure, identify-phases-of-the-moon, identify-rocks-and-minerals, identify-the-photosynthetic-organism, moss-and-fern-life-cycles, origins-of-scientific-names, predict-heat-flow-and-temperature-changes, use-data-to-describe-climates, use-scientific-names-to-classify-organisms                                                                                                                                                                                                                                                                                                                                                                                                                                                                                 |
| grade-8     | analyze-data-to-compare-properties-of-planets, angiosperm-and-conifer-life-cycles, classify-elementary-substances-and-compounds-using-models, classify-symbiotic-relationships, compare-ages-of-fossils-in-a-rock-sequence, compare-amplitudes-and-frequencies-of-waves, compare-concentrations-of-solutions, compare-magnitudes-of-magnetic-forces, compare-thermal-energy-transfers, describe-populations-communities-and-ecosystems, describe-tectonic-plate-boundaries-around-the-world, describe-the-effects-of-gene-mutations-on-organisms, diffusion-across-membranes, identify-and-compare-air-masses s, identify-chemical-formulas-for-ball-and-stick-models, identify-common-and-scientific-names, identify-ecosystems, identify-how-particle-motion-affects-temperature-and-pressure, identify-phases-of-the-moon, identify-rocks-and-minerals, identify-the-photosynthetic-organism, moss-and-fern-life-cycles, origins-of-scientific-names, predict-heat-flow-and-temperature-changes, use-punnett-squares-to-calculate-probabilities-of-offspring-types, use-punnett-squares-to-calculate-ratios-of-offspring-types, use-scientific-names-to-classify-organisms |                                                                                                                                                                                                                                                                                                                                                                                                                                                                                                                                                                                                                                                                                                                                                                                                                                                                                                                                                                                                                                                                                                                                                                                                                                                                                                                                                                                                                                                                                                                                                                                                                   |
| Technology  | -                                                                                                                                                                                                                                                                                                                                                                                                                                                                                                                                                                                                                                                                                                                                                                                                                                                                                                                                                                                                                                                                                                                                                                             | cables, font, icons, logo, parts, peripherals, photo, web, others                                                                                                                                                                                                                                                                                                                                                                                                                                                                                                                                                                                                                                                                                                                                                                                                                                                                                                                                                                                                                                                                                                                                                                                                                                                                                                                                                                                                                                                                                                                                                 |
| Engineering | grade-5                                                                                                                                                                                                                                                                                                                                                                                                                                                                                                                                                                                                                                                                                                                                                                                                                                                                                                                                                                                                                                                                                                                                                                       | identify-laboratory-tools                                                                                                                                                                                                                                                                                                                                                                                                                                                                                                                                                                                                                                                                                                                                                                                                                                                                                                                                                                                                                                                                                                                                                                                                                                                                                                                                                                                                                                                                                                                                                                                         |
|             | grade-6                                                                                                                                                                                                                                                                                                                                                                                                                                                                                                                                                                                                                                                                                                                                                                                                                                                                                                                                                                                                                                                                                                                                                                       | evaluate-tests-of-engineering-design-solutions, identify-control-and-experimental-groups, identify-independent-and-dependent-variables, identify-laboratory-tools, identify-the-experimental-question, laboratory-safety-equipment                                                                                                                                                                                                                                                                                                                                                                                                                                                                                                                                                                                                                                                                                                                                                                                                                                                                                                                                                                                                                                                                                                                                                                                                                                                                                                                                                                                |
|             | grade-7                                                                                                                                                                                                                                                                                                                                                                                                                                                                                                                                                                                                                                                                                                                                                                                                                                                                                                                                                                                                                                                                                                                                                                       | evaluate-tests-of-engineering-design-solutions, identify-control-and-experimental-groups, identify-independent-and-dependent-variables, identify-laboratory-tools, identify-the-experimental-question, laboratory-safety-equipment                                                                                                                                                                                                                                                                                                                                                                                                                                                                                                                                                                                                                                                                                                                                                                                                                                                                                                                                                                                                                                                                                                                                                                                                                                                                                                                                                                                |
|             | grade-8                                                                                                                                                                                                                                                                                                                                                                                                                                                                                                                                                                                                                                                                                                                                                                                                                                                                                                                                                                                                                                                                                                                                                                       | identify-control-and-experimental-groups, identify-laboratory-tools, identify-the-experimental-question, laboratory-safety-equipment                                                                                                                                                                                                                                                                                                                                                                                                                                                                                                                                                                                                                                                                                                                                                                                                                                                                                                                                                                                                                                                                                                                                                                                                                                                                                                                                                                                                                                                                              |

Table 18: Full skill summary (part 1), including science, technology and engineering skills.

| Subject  | Grade     | Skills                                                                                                                                                                                                                                                                                                                                                                                                                                                                                                                                                                                                                                                                                                                                                                                                                                                                                                                                                                                                                                                                                                                                                                                                                                                                                                                 |
|----------|-----------|------------------------------------------------------------------------------------------------------------------------------------------------------------------------------------------------------------------------------------------------------------------------------------------------------------------------------------------------------------------------------------------------------------------------------------------------------------------------------------------------------------------------------------------------------------------------------------------------------------------------------------------------------------------------------------------------------------------------------------------------------------------------------------------------------------------------------------------------------------------------------------------------------------------------------------------------------------------------------------------------------------------------------------------------------------------------------------------------------------------------------------------------------------------------------------------------------------------------------------------------------------------------------------------------------------------------|
| Algebra  | algebra-1 | compare-linear-functions-graphs-and-equations, compare-linear-functions-tables-graphs-and-equations, describe-linear-and-exponential-growth-and-decay, domain-and-range-of-absolute-value-functions-graphs, domain-and-range-of-exponential-functions-graphs, domain-and-range-of-square-root-functions-graphs, factor-quadratics-using-algebra-tiles, identify-direct-variation-and-inverse-variation, identify-functions, identify-functions-vertical-line-test, identify-linear-and-exponential-functions-from-graphs, identify-linear-and-exponential-functions-from-tables, identify-linear-functions-from-graphs-and-equations, identify-linear-functions-from-tables, identify-linear-quadratic-and-exponential-functions-from-graphs, identify-linear-quadratic-and-exponential-functions-from-tables, identify-proportional-relationships, interpret-a-scatter-plot, interpret-the-slope-and-y-intercept-of-a-linear-function, linear-functions-over-unit-intervals, match-exponential-functions-and-graphs-ii, model-and-solve-linear-equations-using-algebra-tiles, multiply-two-binomials-using-algebra-tiles, perimeter-and-area-changes-in-scale, perimeter-area-and-volume-changes-in-scale, special-right-triangles, surface-area-and-volume-changes-in-scale, write-compound-inequalities-from-graphs |
|          | algebra-2 | classify-variation, describe-linear-and-exponential-growth-and-decay, domain-and-range-of-absolute-value-functions-graphs, domain-and-range-of-exponential-and-logarithmic-functions, domain-and-range-of-radical-functions, factor-quadratics-using-algebra-tiles, find-inverse-functions-and-relations, find-solutions-using-a-table, graphs-of-angles, identify-the-direction-a-parabola-opens, linear-functions-over-unit-intervals, match-exponential-functions-and-graphs, outliers-in-scatter-plots, solve-a-triangle                                                                                                                                                                                                                                                                                                                                                                                                                                                                                                                                                                                                                                                                                                                                                                                           |
| Calculus | calculus  | describe-linear-and-exponential-growth-and-decay, determine-continuity-on-an-interval-using-graphs, determine-continuity-using-graphs, determine-one-sided-continuity-using-graphs, domain-and-range, domain-and-range-of-exponential-and-logarithmic-functions, find-inverse-functions-and-relations, find-limits-at-vertical-asymptotes-using-graphs, identify-functions, identify-graphs-of-continuous-functions                                                                                                                                                                                                                                                                                                                                                                                                                                                                                                                                                                                                                                                                                                                                                                                                                                                                                                    |

Table 19: Full skill summary (part 2), including math skills for algebra-{1,2} and calculus.

| Subject      | Grade                                                                                                                                                                                                                                                                                                                                                                                                                                                                                                                                                                                                                                                                                                                                                                                                                                                                                                                                                                                                                                                                                                                                                                                                                                                                                                                                                                                                                                                                                                                                                                                                                                                                                                                                                                                                                                                                                                                                                                                                                                                                                                                                                                                                                                                                                                                                                                                                                                                                                                                                                                                                                  | Skills                                                                                                                                                                                                                                                                                                                                                                                                                                                                                                                                                                                                                                                                                                                                                                                                                                                                                                                                                                                                                                                                                                                                                                                                                                                                                                                                                                                                                                                                                                                                                                                                                                                                                                                                                                                                                                                                                                              |
|--------------|------------------------------------------------------------------------------------------------------------------------------------------------------------------------------------------------------------------------------------------------------------------------------------------------------------------------------------------------------------------------------------------------------------------------------------------------------------------------------------------------------------------------------------------------------------------------------------------------------------------------------------------------------------------------------------------------------------------------------------------------------------------------------------------------------------------------------------------------------------------------------------------------------------------------------------------------------------------------------------------------------------------------------------------------------------------------------------------------------------------------------------------------------------------------------------------------------------------------------------------------------------------------------------------------------------------------------------------------------------------------------------------------------------------------------------------------------------------------------------------------------------------------------------------------------------------------------------------------------------------------------------------------------------------------------------------------------------------------------------------------------------------------------------------------------------------------------------------------------------------------------------------------------------------------------------------------------------------------------------------------------------------------------------------------------------------------------------------------------------------------------------------------------------------------------------------------------------------------------------------------------------------------------------------------------------------------------------------------------------------------------------------------------------------------------------------------------------------------------------------------------------------------------------------------------------------------------------------------------------------------|---------------------------------------------------------------------------------------------------------------------------------------------------------------------------------------------------------------------------------------------------------------------------------------------------------------------------------------------------------------------------------------------------------------------------------------------------------------------------------------------------------------------------------------------------------------------------------------------------------------------------------------------------------------------------------------------------------------------------------------------------------------------------------------------------------------------------------------------------------------------------------------------------------------------------------------------------------------------------------------------------------------------------------------------------------------------------------------------------------------------------------------------------------------------------------------------------------------------------------------------------------------------------------------------------------------------------------------------------------------------------------------------------------------------------------------------------------------------------------------------------------------------------------------------------------------------------------------------------------------------------------------------------------------------------------------------------------------------------------------------------------------------------------------------------------------------------------------------------------------------------------------------------------------------|
| Math         | grade-1                                                                                                                                                                                                                                                                                                                                                                                                                                                                                                                                                                                                                                                                                                                                                                                                                                                                                                                                                                                                                                                                                                                                                                                                                                                                                                                                                                                                                                                                                                                                                                                                                                                                                                                                                                                                                                                                                                                                                                                                                                                                                                                                                                                                                                                                                                                                                                                                                                                                                                                                                                                                                | addition-sentences-up-to-10-what-does-the-model-show, addition-sentences-up-to-10-which-model-matches, addition-sentences-using-number-lines-sums-up-to-20, am-or-pm, certain-probable-unlikely-and-impossible, compare-clocks, compare-money-amounts, compare-objects-length-and-height, compare-sides-and-corners, compare-size-weight-and-capacity, compare-vertices-edges-and-faces, comparing-review, count-sides-and-corners, count-to-fill-a-ten-frame, cubes-and-rectangular-prisms, equal-sides, estimate-to-the-nearest-ten, even-or-odd, find-the-next-shape-in-a-growing-pattern, find-the-next-shape-in-a-patter, flip-turn-and-slide, holds-more-or-less, identify-faces-of-three-dimensional-shapes, identify-fourths, identify-halves, identify-halves-and-fourths, identify-halves-thirds-and-fourths, identify-shapes-traced-from-solids, identify-thirds, interpret-bar-graphs-ii, light-and-heavy, match-analog-and-digital-clocks, match-analog-clocks-and-times, match-digital-clocks-and-times, more-less-and-equally-likely, name-the-three-dimensional-shape, name-the-two-dimensional-shape, names-and-values-of-all-coins, names-and-values-of-common-coins, open-and-closed-shapes, ordinal-numbers, purchases-do-you-have-enough-money, read-a-calendar, read-a-calendar-ii, rhombuses, select-three-dimensional-shapes, select-two-dimensional-shapes, shapes-of-everyday-objects, simple-fractions-what-fraction-does-the-shape-show, square-corners, subtraction-sentences-up-to-10-which-model-matches, subtraction-sentences-using-number-lines-up-to-10, subtraction-sentences-using-number-lines-up-to-20, symmetry, time-and-clocks-word-problems, times-of-everyday-events, two-dimensional-and-three-dimensional-shapes, which-bar-graph-is-correct, which-picture-graph-is-correct, which-table-is-correct, which-chart-is-correct, wide-and-narrow                         |
|              | grade-2                                                                                                                                                                                                                                                                                                                                                                                                                                                                                                                                                                                                                                                                                                                                                                                                                                                                                                                                                                                                                                                                                                                                                                                                                                                                                                                                                                                                                                                                                                                                                                                                                                                                                                                                                                                                                                                                                                                                                                                                                                                                                                                                                                                                                                                                                                                                                                                                                                                                                                                                                                                                                | am-or-pm, certain-probable-unlikely-and-impossible, choose-the-appropriate-measuring-tool, compare-clocks, compare-sides-and-vertices, compare-vertices-edges-and-faces, correct-amount-of-change, cubes, equal-sides, equivalent-amounts-of-money-up-to-1-dollar, estimate-to-the-nearest-ten, even-or-odd, find-the-next-shape-in-a-growing-pattern, find-the-next-shape-in-a-repeating-pattern, flip-turn-and-slide, fractions-of-a-group, fractions-of-a-whole-modeling-word-problems, greatest-and-least-word-problems-up-to-100, greatest-and-least-word-problems-up-to-1000, how-much-more-to-make-a-dollar, identify-faces-of-three-dimensional-shapes, identify-fourths, identify-halves, identify-halves-thirds-and-fourths, identify-lines-of-symmetry, identify-multiplication-sentences-for-equal-groups, identify-repeated-addition-in-arrays-sums-to-10, identify-repeated-addition-in-arrays-sums-to-25, identify-shapes-traced-from-solids, identify-the-fraction, identify-thirds, interpret-bar-graphs-ii, interpret-tally-charts, match-addition-sentences-and-models-sums-to-10, match-analog-and-digital-clocks, match-analog-clocks-and-times, match-digital-clocks-and-times, more-less-and-equally-likely, name-the-three-dimensional-shape, name-the-two-dimensional-shape, names-and-values-of-all-coins, names-and-values-of-common-coins, ordinal-numbers-up-to-100, place-value-models-up-to-hundreds, place-value-tens-and-ones, place-value-up-to-hundreds, place-value-up-to-thousands, purchases-do-you-have-enough-money-up-to-1-dollar, purchases-do-you-have-enough-money-up-to-5-dollars, read-a-calendar, read-a-calendar-ii, read-a-thermometer, select-figures-with-a-given-area, select-three-dimensional-shapes, shapes-of-everyday-objects, skip-counting-stories, symmetry, which-bar-graph-is-correct, which-picture-shows-more-to-describe-pictures-up-to-two-digits |
|              | grade-3                                                                                                                                                                                                                                                                                                                                                                                                                                                                                                                                                                                                                                                                                                                                                                                                                                                                                                                                                                                                                                                                                                                                                                                                                                                                                                                                                                                                                                                                                                                                                                                                                                                                                                                                                                                                                                                                                                                                                                                                                                                                                                                                                                                                                                                                                                                                                                                                                                                                                                                                                                                                                | acute-obtuse-and-right-triangles, am-or-pm, angles-greater-than-less-than-or-equal-to-a-right-angle, certain-probable-unlikely-and-impossible, choose-the-appropriate-measuring-tool, compare-area-and-perimeter-of-two-figures, compare-fractions-in-recipes, compare-fractions-using-models, compare-fractions-using-number-lines, coordinate-planes-as-maps, correct-amount-of-change, division-input-output-tables-find-the-rule, find-the-next-shape-in-a-pattern, fractions-of-a-group-unit-fractions, fractions-of-a-whole-word-problems, identify-equivalent-fractions-on-number-lines, identify-faces-of-three-dimensional-shapes, identify-multiplication-expressions-for-arrays, identify-multiplication-expressions-for-equal-groups, identify-parallelograms, identify-rhombuses, identify-three-dimensional-shape, identify-trapezoids, identify-two-dimensional-shapes, identify-unit-fractions, identify-unit-fractions-on-number-lines, identify-unit-fractions-on-polygons, lines-line-segments-and-rays, match-analog-and-digital-clocks, match-clocks-and-times, match-fractions-to-models-halves-thirds-and-fourths, match-mixed-numbers-to-models, multiplication-input-output-tables-find-the-rule, open-and-closed-shapes, parallel-perpendicular-and-intersecting-lines, parallel-sides-in-quadrilaterals, purchases-do-you-have-enough-money-up-to-10-dollars, read-a-calendar, read-a-thermometer, reading-schedules, reflection-rotation-and-translation, scalene-isosceles-and-equilateral-triangles, select-figures-with-a-given-area, select-fractions-equivalent-to-whole-numbers-using-models, shapes-of-everyday-objects, symmetry, which-picture-shows-more                                                                                                                                                                                                                      |
|              | grade-4                                                                                                                                                                                                                                                                                                                                                                                                                                                                                                                                                                                                                                                                                                                                                                                                                                                                                                                                                                                                                                                                                                                                                                                                                                                                                                                                                                                                                                                                                                                                                                                                                                                                                                                                                                                                                                                                                                                                                                                                                                                                                                                                                                                                                                                                                                                                                                                                                                                                                                                                                                                                                | acute-obtuse-and-right-triangles, acute-right-obtuse-and-straight-angles, angles-as-fractions-of-a-circle, angles-of-90-180-270-and-360-degrees, classify-triangles, compare-area-and-perimeter-of-two-figures, compare-decimals-using-models, compare-fractions-in-recipes, compare-fractions-using-models, compare-fractions-with-like-numerators-or-denominators-using-models, decompose-fractions-into-unit-fractions-using-models, elapsed-time, estimate-angle-measurements, find-the-next-shape-in-a-pattern, fractions-of-a-whole-word-problems, identify-equivalent-fractions-using-number-lines, identify-face-s-of-three-dimensional-figures, identify-lines-of-symmetry, identify-parallel-perpendicular-and-intersecting-lines, identify-parallelograms, identify-rhombuses, identify-three-dimensional-figures, identify-trapezoids, interpret-bar-graphs, interpret-bar-graphs, interpret-stem-and-leaf-plots, is-a-polygon, measure-angles-with-a-protractor, multiplication-input-output-tables-find-the-rule, multiply-fractions-by-whole-numbers-using-models, multiply-unit-fractions-by-whole-numbers-using-models, nets-of-three-dimensional-figures, parallel-perpendicular-and-intersecting-lines, parallel-sides-in-quadrilaterals, points-lines-line-segments-rays-and-angles, properties-of-three-dimensional-figures, rotational-symmetry, scalene-isosceles-and-equilateral-triangles, sides-and-angles-of-quadrilaterals, transportation-schedules, what-decimal-number-is-illustrated                                                                                                                                                                                                                                                                                                                                                                                                |
|              | grade-5                                                                                                                                                                                                                                                                                                                                                                                                                                                                                                                                                                                                                                                                                                                                                                                                                                                                                                                                                                                                                                                                                                                                                                                                                                                                                                                                                                                                                                                                                                                                                                                                                                                                                                                                                                                                                                                                                                                                                                                                                                                                                                                                                                                                                                                                                                                                                                                                                                                                                                                                                                                                                | acute-obtuse-and-right-triangles, adjust-a-budget, angles-of-90-180-270-and-360-degrees, classify-triangles, compare-decimals-using-grids, compare-fractions-and-mixed-numbers, compare-patterns, fractions-of-a-whole-word-problems, identify-parallelograms, identify-rhombuses, identify-three-dimensional-figures, identify-trapezoids, interpret-bar-graphs, is-a-polygon, line-symmetry, mean-find-the-missing-number, median-find-the-missing-number, multiplication-input-output-tables-find-the-rule, multiply-unit-fractions-by-whole-numbers-using-models, multiplying-fractions-by-whole-numbers-choose-the-model, nets-of-three-dimensional-figures, parallel-perpendicular-and-intersecting-lines, parallel-sides-in-quadrilaterals, parts-of-a-circle, points-lines-line-segments-rays-and-angles, range-find-the-missing-number, reflection-rotation-and-translation, regular-and-irregular-polygons, rotational-symmetry, rotational-symmetry-amount-of-rotation, scalene-isosceles-and-equilateral-triangles, three-dimensional-figures-viewed-from-different-perspectives, types-of-angles, understanding-probability                                                                                                                                                                                                                                                                                                                                                                                                                                                                                                                                                                                                                                                                                                                                                                            |
|              | grade-6                                                                                                                                                                                                                                                                                                                                                                                                                                                                                                                                                                                                                                                                                                                                                                                                                                                                                                                                                                                                                                                                                                                                                                                                                                                                                                                                                                                                                                                                                                                                                                                                                                                                                                                                                                                                                                                                                                                                                                                                                                                                                                                                                                                                                                                                                                                                                                                                                                                                                                                                                                                                                | absolute-value-and-integers-word-problems, changes-in-mean-median-mode-and-range, classify-rational-numbers-using-a-diagram, classify-triangles, compare-and-order-rational-numbers-using-number-lines, compare-area-and-perimeter-of-two-figures, compare-checking-accounts, front-side-and-top-view, identify-complementary-supplementary-vertical-adjacent-and-congruent-angles, identify-equivalent-expressions-using-strip-models, identify-polyhedra, identify-trapezoids, interpret-bar-graphs, interpret-double-bar-graphs, interpret-graphs-of-proportional-relationships, interpret-histograms, line-symmetry, mean-median-mode-and-range-find-the-missing-number, model-and-solve-equations-using-algebra-tiles, nets-of-three-dimensional-figures, occupations-education-and-income, quadrants, rational-numbers-find-the-sign, reflection-rotation-and-translation, rotational-symmetry, rotational-symmetry-amount-of-rotation, similar-and-congruent-figures, understanding-area-of-a-triangle, understanding-area-of-trapezoids, understanding-percent-strip-models, which-figure-is-being-described, which-is-the-better-coupon, which-model-represents-the-ratio                                                                                                                                                                                                                                                                                                                                                                                                                                                                                                                                                                                                                                                                                                                                  |
|              | grade-7                                                                                                                                                                                                                                                                                                                                                                                                                                                                                                                                                                                                                                                                                                                                                                                                                                                                                                                                                                                                                                                                                                                                                                                                                                                                                                                                                                                                                                                                                                                                                                                                                                                                                                                                                                                                                                                                                                                                                                                                                                                                                                                                                                                                                                                                                                                                                                                                                                                                                                                                                                                                                | apply-addition-and-subtraction-rules, apply-multiplication-and-division-rules, bases-of-three-dimensional-figures, changes-in-mean-median-mode-and-range, classify-quadrilaterals, classify-rational-numbers-using-a-diagram, compare-and-order-integers, cross-sections-of-three-dimensional-figures, describe-a-sequence-of-transformations, front-side-and-top-view, identify-alternate-interior-and-alternate-exterior-angles, identify-complementary-supplementary-vertical-and-adjacent-angles, identify-equivalent-linear-expressions-using-algebra-tiles, identify-linear-and-nonlinear-functions, identify-reflections-rotations-and-translations, identify-trapezoids, identify-trends-with-scatter-plots, interpret-circle-graphs, interpret-graphs-of-proportional-relationships, line-symmetry, make-predictions-with-scatter-plots, mean-median-mode-and-range-find-the-missing-number, model-and-solve-equations-using-algebra-tiles, nets-of-three-dimensional-figures, parallel-perpendicular-and-intersecting-lines, parts-of-a-circle, perimeter-and-area-changes-in-scale, rational-numbers-find-the-sign, rotational-symmetry, rotational-symmetry-amount-of-rotation, similar-and-congruent-figures, simplify-expressions-by-combining-like-terms-with-algebra-tiles, transversals-of-parallel-lines-name-angle-pairs, which-is-the-better-coupon                                                                                                                                                                                                                                                                                                                                                                                                                                                                                                                                             |
|              | grade-8                                                                                                                                                                                                                                                                                                                                                                                                                                                                                                                                                                                                                                                                                                                                                                                                                                                                                                                                                                                                                                                                                                                                                                                                                                                                                                                                                                                                                                                                                                                                                                                                                                                                                                                                                                                                                                                                                                                                                                                                                                                                                                                                                                                                                                                                                                                                                                                                                                                                                                                                                                                                                | angle-angle-criterion-for-similar-triangles, apply-addition-and-subtraction-rules, apply-addition-subtraction-multiplication-and-division-rules, apply-multiplication-and-division-rules, base-plans, changes-in-mean-median-mode-and-range, classify-quadrilaterals, compare-and-order-integers, compare-linear-functions-graphs-and-equations, compare-linear-functions-tables-graphs-and-equations, congruent-triangles-sss-sas-and-asa, describe-a-sequence-of-transformations, front-side-and-top-view, identify-alternate-interior-and-alternate-exterior-angles, identify-complementary-supplementary-vertical-adjacent-and-congruent-angles, identify-congruent-figures, identify-functions-graphs, identify-linear-and-nonlinear-functions-graphs-and-equations, identify-linear-and-nonlinear-functions-tables, identify-lines-of-best-fit, identify-reflections-rotations-and-translations, identify-similar-triangles, identify-trapezoids, identify-trends-with-scatter-plots, interpret-graphs-of-proportional-relationships, interpret-the-slope-and-y-intercept-of-a-linear-function, irrational-numbers-on-number-lines, line-symmetry, make-predictions-with-scatter-plots, mean-median-mode-and-range-find-the-missing-number, model-and-solve-equations-using-algebra-tiles, multiply-polynomials-using-algebra-tiles, nets-of-three-dimensional-figures, parts-of-a-circle, parts-of-three-dimensional-figures, perimeter-and-area-changes-in-scale, quadrants-and-axes, rotational-symmetry, rotational-symmetry-amount-of-rotation, similar-and-congruent-figures, transversals-of-parallel-lines-name-angle-pairs                                                                                                                                                                                                                                                                           |
| kindergarten | addition-sentences-up-to-10-what-does-the-model-show, addition-sentences-up-to-10-which-model-matches, addition-sentences-up-to-5-what-does-the-model-show, addition-sentences-up-to-5-which-model-matches, am-or-pm, are-there-enough, circles, circles-squares-and-triangles, circles-squares-triangles-and-rectangles, classify-shapes-by-color, compare-size-weight-and-capacity, cones, count-corners, count-cubes-up-to-10, count-cubes-up-to-10, count-dots-up-to-10, count-dots-up-to-3, count-dots-up-to-5, count-dots-up-to-10, count-money-pennies-and-nickels, count-money-pennies-through-dimes, count-on-ten-frames-up-to-10, count-pictures-up-to-10, count-pictures-up-to-3, count-pictures-up-to-5, count-scattered-shapes-up-to-10, count-scattered-shapes-up-to-5, count-shapes-in-rings-up-to-10, count-shapes-in-rows-up-to-10, count-shapes-in-rows-up-to-5, count-shapes-up-to-5, count-shapes-up-to-3, count-sides, count-sides-and-corners, count-to-100, count-to-fill-a-ten-frame, cubes, curved-parts, cylinders, different-equal-sides, fewer-and-more-compare-by-counting, fewer-and-more-compare-by-matching, fewer-and-more-compare-in-a-mixed-group, fewer-and-more-up-to-20, fewer-more-and-same, flat-and-solid-shapes, hexagons, hold-more-or-less, identify-halves-thirds-fourths, identify-pictures-with-symmetry, identify-shapes-traced-from-solids, inside-and-outside, introduction-to-symmetry, light-and-heavy, match-analog-and-digital-clocks, match-analog-clocks-and-times, match-digital-clocks-and-times, more-less-and-equally-likely, name-the-three-dimensional-shape, name-the-two-dimensional-shape, one-less-with-pictures-up-to-10, one-less-with-pictures-up-to-5, one-more-and-one-less-with-pictures-up-to-10, one-more-with-pictures-up-to-10, one-more-with-pictures-up-to-5, ordinal-numbers-up-to-fifth, ordinal-numbers-up-to-tenth, rectangles, represent-numbers-up-to-10, represent-numbers-up-to-5, represent-numbers-with-pictures-up-to-3, represent-numbers-with-pictures-up-to-5, represent-numbers-with-shapes-up-to-3, select-three-dimensional-shapes, select-two-dimensional-shapes, shapes-of-everyday-objects, spheres, square-corners, squares, subtraction-sentences-up-to-10-what-does-the-model-show, subtraction-sentences-up-to-10-which-model-matches, subtraction-sentences-up-to-5-what-does-the-model-show, subtraction-sentences-up-to-5-which-model-matches, take-apart-10-words, take-apart-numbers-up-to-10-words, take-apart-numbers-up-to-5-words, tall-and-short, times-of-everyday-events, triangles, wide-and-narrow |                                                                                                                                                                                                                                                                                                                                                                                                                                                                                                                                                                                                                                                                                                                                                                                                                                                                                                                                                                                                                                                                                                                                                                                                                                                                                                                                                                                                                                                                                                                                                                                                                                                                                                                                                                                                                                                                                                                     |
| pre-k        | addition-sentences-up-to-10-what-does-the-model-show, addition-sentences-up-to-10-which-model-matches, addition-sentences-up-to-5-what-does-the-model-show, addition-sentences-up-to-5-which-model-matches, are-there-enough, circles, circles-squares-and-triangles, circles-squares-triangles-and-rectangles, classify-shapes-by-color, compare-size-weight-and-capacity, cones, count-corners, count-cubes-up-to-10, count-cubes-up-to-5, count-dots-up-to-5, count-dots-up-to-3, count-dots-up-to-10, count-on-ten-frames-up-to-10, count-on-ten-frames-up-to-3, count-on-ten-frames-up-to-5, count-pennies, count-pictures-up-to-10, count-pictures-up-to-3, count-pictures-up-to-5, count-scattered-shapes-up-to-10, count-scattered-shapes-up-to-5, count-shapes-in-rings-up-to-10, count-shapes-in-rows-up-to-10, count-shapes-in-rows-up-to-5, count-shapes-up-to-5, count-shapes-up-to-3, count-sides, count-sides-and-corners, count-to-100, count-to-fill-a-ten-frame, cubes, curved-parts, cylinders, different-equal-sides, fewer-and-more-compare-in-a-mixed-group, fewer-more-and-same, flat-and-solid-shapes, holds-more-or-less, identify-shapes-traced-from-solids, inside-and-outside, light-and-heavy, name-the-shape, name-the-solid-shape, one-less-with-pictures-up-to-10, one-less-with-pictures-up-to-5, one-more-with-pictures-up-to-10, one-more-with-pictures-up-to-5, ordinal-numbers-up-to-fifth, ordinal-numbers-up-to-tenth, pennies-and-nickels, pennies-nickels-dimes-and-quarters, rectangles, represent-numbers-up-to-10, represent-numbers-up-to-5, represent-numbers-with-pictures-up-to-3, represent-numbers-with-shapes-up-to-3, represent-numbers-with-shapes-up-to-5, select-solid-shapes, shapes-of-everyday-objects, spheres, squares, subtraction-sentences-up-to-10-which-model-matches, subtraction-sentences-up-to-5-which-model-matches, tall-and-short, tally-marks-up-to-10, triangles, what-comes-next, wide-and-narrow                                                                                                                                                                                                                                                                                                                                                                                                                                                                                                                                                                                                                                           |                                                                                                                                                                                                                                                                                                                                                                                                                                                                                                                                                                                                                                                                                                                                                                                                                                                                                                                                                                                                                                                                                                                                                                                                                                                                                                                                                                                                                                                                                                                                                                                                                                                                                                                                                                                                                                                                                                                     |
| precalculus  | determine-continuity-on-an-interval-using-graphs, determine-continuity-using-graphs, determine-one-sided-continuity-using-graphs, find-limits-at-vertical-asymptotes-using-graphs, identify-graphs-of-continuous-functions, outliers-in-scatter-plots, solve-a-triangle                                                                                                                                                                                                                                                                                                                                                                                                                                                                                                                                                                                                                                                                                                                                                                                                                                                                                                                                                                                                                                                                                                                                                                                                                                                                                                                                                                                                                                                                                                                                                                                                                                                                                                                                                                                                                                                                                                                                                                                                                                                                                                                                                                                                                                                                                                                                                |                                                                                                                                                                                                                                                                                                                                                                                                                                                                                                                                                                                                                                                                                                                                                                                                                                                                                                                                                                                                                                                                                                                                                                                                                                                                                                                                                                                                                                                                                                                                                                                                                                                                                                                                                                                                                                                                                                                     |

Table 20: Full skill summary (part 3), including math skills for grade 1-8 and pre-k, kindergarten and pre-calculus.

|                                                                                                                                                                                                                                                                                                                                                                                                                                                                                                                                                                                                                                                                                                                                                                                                                                                                                                                                                                                                                                                                                                                                                                                                                                                                                                                   |                                                                                                                                                                                                                                                                                                                                                                                                                                                                                                                                                                                                                                                                                                                                                                                                                                                                                                                                                                                                     |
|-------------------------------------------------------------------------------------------------------------------------------------------------------------------------------------------------------------------------------------------------------------------------------------------------------------------------------------------------------------------------------------------------------------------------------------------------------------------------------------------------------------------------------------------------------------------------------------------------------------------------------------------------------------------------------------------------------------------------------------------------------------------------------------------------------------------------------------------------------------------------------------------------------------------------------------------------------------------------------------------------------------------------------------------------------------------------------------------------------------------------------------------------------------------------------------------------------------------------------------------------------------------------------------------------------------------|-----------------------------------------------------------------------------------------------------------------------------------------------------------------------------------------------------------------------------------------------------------------------------------------------------------------------------------------------------------------------------------------------------------------------------------------------------------------------------------------------------------------------------------------------------------------------------------------------------------------------------------------------------------------------------------------------------------------------------------------------------------------------------------------------------------------------------------------------------------------------------------------------------------------------------------------------------------------------------------------------------|
| <p>Subject: Engineer<br/>Skill: evaluate-tests-of-engineering-design-solutions<br/>Description: Which of the following could Eliana's test show? Eliana was taking part in her school's engineering competition. To win the competition, she needed to build the popsicle-stick bridge that would hold the most weight. She could use only 200 popsicle sticks. She had two different design ideas. She had to pick one of the designs to use in the competition. To test which design was strongest, Eliana built two prototypes, each with 200 popsicle sticks. She then added 1 kg weights to each prototype until one of them broke. The passage below describes how the engineering-design process was used to test a solution to a problem. Read the passage. Then answer the question below.</p>  <p>Picture:<br/>Choices: [how much weight a bridge built with 300 popsicle sticks could hold, <b>which design could hold more weight,</b> ]<br/>Answer index: 1</p>                                                                                                                                                                                                                                                     | <p>Subject: Engineer<br/>Skill: identify-control-and-experimental-groups<br/>Description: In this experiment, which were part of a control group? The passage below describes an experiment. Madelyn has a bubble machine and wants to know how to make the bubbles last longer. She read that bubbles burst when the liquid that makes up the bubbles evaporates. Madelyn knew that when liquids are warmer, they evaporate faster. So, she wondered if she could make her bubbles last longer by cooling the bubble solution. Madelyn cooled six bottles of bubble solution to 30°F below room temperature. She left another six bottles of bubble solution at room temperature. Then, she measured how long bubbles made from the solution in each bottle lasted.</p>  <p>Picture:<br/>Choices: [the bottles that were cooled down, <b>the bottles that were at room temperature,</b> ]<br/>Answer index: 1</p> |
| <p>Subject: Engineer<br/>Skill: identify-independent-and-dependent-variables<br/>Description: Hint: An independent variable is a variable whose effect you are investigating. A dependent variable is a variable that you measure. Which of the following was a dependent variable in this experiment? The passage below describes an experiment. Read the passage and think about the variables that are described. Giardia is a microscopic parasite that lives in water and can infect humans. Dr. Roth designed a drinking straw that contained a filter to remove Giardia from water. Dr. Roth wanted to know if a longer filtering straw would remove more Giardia. Dr. Roth made six filtering straws: three that were five inches long and three that were ten inches long. She prepared six one-liter batches of water, each containing 10,000 Giardia. Then, Dr. Roth passed one batch of water through each straw. After each batch passed through the straw, she used a microscope to count the number of Giardia that remained in a small sample of the water.</p>  <p>Picture:<br/>Choices: [<b>the number of Giardia that remained in the water,</b> the length of the filtering straw. ]<br/>Answer index: 0</p> | <p>Subject: Engineer<br/>Skill: identify-laboratory-tools<br/>Description: Select the round-bottom flask.</p>  <p>Picture: None<br/>Choices:<br/>Answer index: 1</p>                                                                                                                                                                                                                                                                                                                                                                                                                                                                                                                                                                                                                                                                                                                                              |
| <p>Subject: Engineer<br/>Skill: identify-the-experimental-question<br/>Description: Identify the question that Jeffrey's experiment can best answer. The passage below describes an experiment. Read the passage and then follow the instructions below. Jeffrey mixed bacteria into a nutrient-rich liquid where the bacteria could grow. He poured four ounces of the mixture into each of ten glass flasks. In five of the ten flasks, he also added one teaspoon of cinnamon. He allowed the bacteria in the flasks to grow overnight in a 37°C room. Then, Jeffrey used a microscope to count the number of bacteria in a small sample from each flask. He compared the amount of bacteria in the liquid with cinnamon to the amount of bacteria in the liquid without cinnamon.</p>  <p>Picture:<br/>Choices: [<b>Do more bacteria grow in liquid with cinnamon than in liquid without cinnamon?</b>, Does temperature affect how much bacteria can grow in liquid?. ]<br/>Answer index: 0</p>                                                                                                                                                                                                                            | <p>Subject: Engineer<br/>Skill: laboratory-safety-equipment<br/>Description: Select the apron.</p>  <p>Picture: None<br/>Choices:<br/>Answer index: 3</p>                                                                                                                                                                                                                                                                                                                                                                                                                                                                                                                                                                                                                                                                                                                                                         |
| <p>Subject: Math<br/>Skill: absolute-value-and-integers-word-problems<br/>Description: Debbie likes watching the show Engineering Marvels. In last night's episode, the engineering team visited a tall skyscraper and a deep mine. A banner at the bottom of the screen showed the elevation of each location the team visited. Which location is closer to sea level?</p>  <p>Picture:<br/>Choices: [<b>bottom of the mine,</b> top of the skyscraper. ]<br/>Answer index: 0</p>                                                                                                                                                                                                                                                                                                                                                                                                                                                                                                                                                                                                                                                                                                                                             | <p>Subject: Math<br/>Skill: acute-obtuse-and-right-triangles<br/>Description: What kind of triangle is this?</p>  <p>Picture:<br/>Choices: [<b>obtuse,</b> right, acute. ]<br/>Answer index: 0</p>                                                                                                                                                                                                                                                                                                                                                                                                                                                                                                                                                                                                                                                                                                               |
| <p>Subject: Math<br/>Skill: acute-right-obtuse-and-straight-angles<br/>Description: Is this angle acute, right, obtuse, or straight?</p>  <p>Picture:<br/>Choices: [straight, <b>obtuse,</b> acute, right. ]<br/>Answer index: 1</p>                                                                                                                                                                                                                                                                                                                                                                                                                                                                                                                                                                                                                                                                                                                                                                                                                                                                                                                                                                                           | <p>Subject: Math<br/>Skill: addition-sentences-up-to-10-what-does-the-model-show<br/>Description: Which addition sentence does the picture show?</p>  <p>Picture:<br/>Choices: [<b>4+3=7,</b> 5+2=7. ]<br/>Answer index: 0</p>                                                                                                                                                                                                                                                                                                                                                                                                                                                                                                                                                                                                                                                                                   |
| <p>Subject: Math<br/>Skill: addition-sentences-up-to-10-which-model-matches<br/>Description: Which shows 8+1=9?</p>  <p>Picture: None<br/>Choices:<br/>Answer index: 0</p>                                                                                                                                                                                                                                                                                                                                                                                                                                                                                                                                                                                                                                                                                                                                                                                                                                                                                                                                                                                                                                                     | <p>Subject: Math<br/>Skill: addition-sentences-up-to-5-what-does-the-model-show<br/>Description: Which addition sentence does the picture show?</p>  <p>Picture:<br/>Choices: [<b>4+1=5,</b> 3+1=4. ]<br/>Answer index: 0</p>                                                                                                                                                                                                                                                                                                                                                                                                                                                                                                                                                                                                                                                                                    |
| <p>Subject: Math<br/>Skill: addition-sentences-up-to-5-which-model-matches<br/>Description: Which shows 2+1=3?</p>  <p>Picture: None<br/>Choices:<br/>Answer index: 0</p>                                                                                                                                                                                                                                                                                                                                                                                                                                                                                                                                                                                                                                                                                                                                                                                                                                                                                                                                                                                                                                                      | <p>Subject: Math<br/>Skill: addition-sentences-using-number-lines-sums-up-to-20<br/>Description: Which addition sentence does this model show?</p>  <p>Picture:<br/>Choices: [3+3=6, 5+6=11, 5+4=9, <b>5+3=8,</b> ]<br/>Answer index: 3</p>                                                                                                                                                                                                                                                                                                                                                                                                                                                                                                                                                                                                                                                                      |
| <p>Subject: Math<br/>Skill: adjust-a-budget<br/>Description: This table shows Angie's February budget. What could Angie do to balance her budget?</p>  <p>Picture:<br/>Choices: [spend only \$60 at the mall, and teach a baking class for \$30, <b>decorate more custom cookies to earn another \$35,</b> and spend only \$60 at the mall, spend \$20 more on the baking kit, and teach a baking class for \$30, decorate more custom cookies to earn another \$35, and spend \$20 more on the baking kit. ]<br/>Answer index: 1</p>                                                                                                                                                                                                                                                                                                                                                                                                                                                                                                                                                                                                                                                                                          | <p>Subject: Math<br/>Skill: am-or-pm<br/>Description: Farmer Keenan is getting up to go milk his cows. It is just before sunrise. His watch shows: What time is it?</p>  <p>Picture:<br/>Choices: [4:30 P.M., <b>4:30 A.M.,</b> ]<br/>Answer index: 1</p>                                                                                                                                                                                                                                                                                                                                                                                                                                                                                                                                                                                                                                                        |
| <p>Subject: Math<br/>Skill: angle-angle-criterion-for-similar-triangles<br/>Description: FGH and JKL are shown below. Which statement is true?</p>  <p>Picture:<br/>Choices: [FGH is similar to JKL., FGH is not similar to JKL., <b>There is not enough information to determine whether the triangles are similar.,</b> ]<br/>Answer index: 2</p>                                                                                                                                                                                                                                                                                                                                                                                                                                                                                                                                                                                                                                                                                                                                                                                                                                                                            | <p>Subject: Math<br/>Skill: angles-as-fractions-of-a-circle<br/>Description: What fraction of the circle does this angle cut out?</p>  <p>Picture:<br/>Choices: [1/4, 3/4, 1 whole, 1/2. ]<br/>Answer index: 0</p>                                                                                                                                                                                                                                                                                                                                                                                                                                                                                                                                                                                                                                                                                               |

Table 21: Question examples for each skill (part 1).

|                                                                                                                                                                                                                                                                                    |                                                                                                                                                                                                                                                                                      |
|------------------------------------------------------------------------------------------------------------------------------------------------------------------------------------------------------------------------------------------------------------------------------------|--------------------------------------------------------------------------------------------------------------------------------------------------------------------------------------------------------------------------------------------------------------------------------------|
| <p>Subject: Math<br/>Skill: count-money-pennies-and-nickels<br/>Description: How much money is there?</p>  <p>Picture:<br/>Choices: [6¢, 11¢, 16¢, ]<br/>Answer index: 1</p>                      | <p>Subject: Math<br/>Skill: count-money-pennies-through-dimes<br/>Description: How much money is there?</p>  <p>Picture:<br/>Choices: [18¢, 16¢, 19¢, ]<br/>Answer index: 0</p>                     |
| <p>Subject: Math<br/>Skill: count-on-ten-frames-up-to-10<br/>Description: How many dots are on the frame?</p>  <p>Picture:<br/>Choices: [4, 9, 2, 8, 1, 7, 5, 10, 6, 3, ]<br/>Answer index: 1</p> | <p>Subject: Math<br/>Skill: count-on-ten-frames-up-to-3<br/>Description: How many dots are on the frame?</p>  <p>Picture:<br/>Choices: [3, 2, 1, ]<br/>Answer index: 1</p>                          |
| <p>Subject: Math<br/>Skill: count-on-ten-frames-up-to-5<br/>Description: How many squares are on the frame?</p>  <p>Picture:<br/>Choices: [4, 5, 1, 2, 3, ]<br/>Answer index: 1</p>               | <p>Subject: Math<br/>Skill: count-pennies<br/>Description: How much money is there?</p>  <p>Picture:<br/>Choices: [7¢, 6¢, 8¢, ]<br/>Answer index: 2</p>                                            |
| <p>Subject: Math<br/>Skill: count-pictures-up-to-10<br/>Description: How many parrots are there?</p>  <p>Picture:<br/>Choices: [1, 4, 3, 6, 9, 5, 7, 10, 8, 2, ]<br/>Answer index: 4</p>          | <p>Subject: Math<br/>Skill: count-pictures-up-to-3<br/>Description: How many butterflies are there?</p>  <p>Picture:<br/>Choices: [2, 1, 3, ]<br/>Answer index: 2</p>                               |
| <p>Subject: Math<br/>Skill: count-pictures-up-to-5<br/>Description: How many snowmen are there?</p>  <p>Picture:<br/>Choices: [2, 5, 1, 4, 3, ]<br/>Answer index: 4</p>                          | <p>Subject: Math<br/>Skill: count-scattered-shapes-up-to-10<br/>Description: How many shapes are there?</p>  <p>Picture:<br/>Choices: [2, 3, 8, 1, 9, 10, 4, 6, 7, 5, ]<br/>Answer index: 5</p>    |
| <p>Subject: Math<br/>Skill: count-scattered-shapes-up-to-5<br/>Description: How many rectangles are there?</p>  <p>Picture:<br/>Choices: [2, 4, 5, 3, 1, ]<br/>Answer index: 2</p>              | <p>Subject: Math<br/>Skill: count-shapes-in-rings-up-to-10<br/>Description: How many triangles are there?</p>  <p>Picture:<br/>Choices: [9, 3, 5, 2, 7, 6, 8, 1, 4, 10, ]<br/>Answer index: 4</p> |
| <p>Subject: Math<br/>Skill: count-shapes-in-rows-up-to-10<br/>Description: How many hearts are there?</p>  <p>Picture:<br/>Choices: [5, 1, 7, 9, 8, 10, 3, 4, 2, 6, ]<br/>Answer index: 3</p>   | <p>Subject: Math<br/>Skill: count-shapes-in-rows-up-to-5<br/>Description: How many shapes are there?</p>  <p>Picture:<br/>Choices: [3, 2, 1, 4, 5, ]<br/>Answer index: 0</p>                      |
| <p>Subject: Math<br/>Skill: count-shapes-up-to-3<br/>Description: How many triangles are there?</p>  <p>Picture:<br/>Choices: [2, 1, 3, ]<br/>Answer index: 0</p>                               | <p>Subject: Math<br/>Skill: count-sides<br/>Description: Which shape has 4 sides?</p> <p>Picture: None</p>  <p>Choices:<br/>Answer index: 1</p>                                                  |
| <p>Subject: Math<br/>Skill: count-sides-and-corners<br/>Description: Which shape has 5 corners?</p> <p>Picture: None</p>  <p>Choices:<br/>Answer index: 1</p>                                   | <p>Subject: Math<br/>Skill: count-to-100<br/>Description: How many dots are there?</p>  <p>Picture:<br/>Choices: [46, 49, 44, ]<br/>Answer index: 0</p>                                           |

Table 22: Question examples for each skill (part 2).

|                                                                                                                                                                                                                                                                                                                                                                                                                                                   |                                                                                                                                                                                                                                                                                                                                                                                 |
|---------------------------------------------------------------------------------------------------------------------------------------------------------------------------------------------------------------------------------------------------------------------------------------------------------------------------------------------------------------------------------------------------------------------------------------------------|---------------------------------------------------------------------------------------------------------------------------------------------------------------------------------------------------------------------------------------------------------------------------------------------------------------------------------------------------------------------------------|
| <p>Subject: Math<br/>Skill: identify-alternate-interior-and-alternate-exterior-angles<br/>Description: line {RT} and line {UW} are parallel lines. Which angles are alternate interior angles?<br/>Picture: <br/>Choices: [angle{TSV} and angle{UVS}, angle{TSV} and angle{TSQ}, angle{TSV} and angle{RSV}, angle{TSV} and angle{WVS}, ]<br/>Answer index: 0</p> | <p>Subject: Math<br/>Skill: identify-complementary-supplementary-vertical-adjacent-and-congruent-angles<br/>Description: Which angle is vertical to angle {3}?<br/>Picture: <br/>Choices: [angle{6}, angle{5}, angle{4}, angle{2}, ]<br/>Answer index: 0</p>                                   |
| <p>Subject: Math<br/>Skill: identify-complementary-supplementary-vertical-adjacent-angles<br/>Description: Which angles are adjacent to each other?<br/>Picture: <br/>Choices: [angle{1}angle{3} and angle{7}, angle{1}angle{5} and angle{1}angle{4}, angle{8} and angle{4}, angle{1}angle{0} and angle{4}, ]<br/>Answer index: 1</p>                            | <p>Subject: Math<br/>Skill: identify-congruent-figures<br/>Description: Are these shapes congruent?<br/>Picture: <br/>Choices: [no, yes, ]<br/>Answer index: 1</p>                                                                                                                             |
| <p>Subject: Math<br/>Skill: identify-direct-variation-and-inverse-variation<br/>Description: Which equation shows direct variation?<br/>Picture: None<br/><math display="block">y = \frac{x}{-34} \quad y = \frac{x}{-34}</math><br/>Choices:<br/>Answer index: 1</p>                                                                                                                                                                             | <p>Subject: Math<br/>Skill: identify-equivalent-expressions-using-strip-models<br/>Description: This model represents the expression <math>x+x+1+1</math>. Which expression is equivalent to <math>x+x+1+1</math>?<br/>Picture: <br/>Choices: [4x, 2x+3, 3x+1, 2x+2, ]<br/>Answer index: 3</p> |
| <p>Subject: Math<br/>Skill: identify-equivalent-fractions-on-number-lines<br/>Description: Is <math>1/2</math> equivalent to <math>1/3</math>?<br/>Picture: <br/>Choices: [no, yes, ]<br/>Answer index: 0</p>                                                                                                                                                    | <p>Subject: Math<br/>Skill: identify-equivalent-fractions-using-number-lines<br/>Description: Is <math>2/3</math> equivalent to <math>4/6</math>?<br/>Picture: <br/>Choices: [yes, no, ]<br/>Answer index: 0</p>                                                                               |
| <p>Subject: Math<br/>Skill: identify-equivalent-linear-expressions-using-algebra-tiles<br/>Description: These tiles represent the expression <math>3x+5x</math>. Which expression is equivalent to <math>3x+5x</math>?<br/>Picture: <br/>Choices: [x+8, 2x, 8x, 8x+2, ]<br/>Answer index: 2</p>                                                                 | <p>Subject: Math<br/>Skill: identify-faces-of-three-dimensional-figures<br/>Description: Which shape has a circle as a face?<br/>Picture: None<br/><br/>Choices:<br/>Answer index: 1</p>                                                                                                     |
| <p>Subject: Math<br/>Skill: identify-faces-of-three-dimensional-shapes<br/>Description: Which shape has a circle as a face?<br/>Picture: None<br/><br/>Choices:<br/>Answer index: 1</p>                                                                                                                                                                        | <p>Subject: Math<br/>Skill: identify-fourths<br/>Description: Look at the colored part of each shape. Which shape shows one-fourth?<br/>Picture: None<br/><br/>Choices:<br/>Answer index: 3</p>                                                                                             |
| <p>Subject: Math<br/>Skill: identify-functions<br/>Description: Look at this graph: Is this relation a function?<br/>Picture: <br/>Choices: [yes, no, ]<br/>Answer index: 1</p>                                                                                                                                                                                | <p>Subject: Math<br/>Skill: identify-functions-graphs<br/>Description: Which of these relations is a function?<br/>Picture: None<br/><br/>Choices:<br/>Answer index: 3</p>                                                                                                                  |
| <p>Subject: Math<br/>Skill: identify-functions-vertical-line-test<br/>Description: Which of these relations is a function?<br/>Picture: None<br/><br/>Choices:<br/>Answer index: 3</p>                                                                                                                                                                         | <p>Subject: Math<br/>Skill: identify-graphs-of-continuous-functions<br/>Description: Is the function <math>f(x)</math> continuous?<br/>Picture: <br/>Choices: [yes, no, ]<br/>Answer index: 0</p>                                                                                            |
| <p>Subject: Math<br/>Skill: identify-halves<br/>Description: Look at the colored part of each shape. Which shape shows one-half?<br/>Picture: None<br/><br/>Choices:<br/>Answer index: 0</p>                                                                                                                                                                   | <p>Subject: Math<br/>Skill: identify-halves-and-fourths<br/>Description: Which figure shows fourths?<br/>Picture: None<br/><br/>Choices:<br/>Answer index: 1</p>                                                                                                                            |

Table 23: Question examples for each skill (part 3).

|                                                                                                                                                                                                                                                                                                                                     |                                                                                                                                                                                                                                                                                                                                                                                |
|-------------------------------------------------------------------------------------------------------------------------------------------------------------------------------------------------------------------------------------------------------------------------------------------------------------------------------------|--------------------------------------------------------------------------------------------------------------------------------------------------------------------------------------------------------------------------------------------------------------------------------------------------------------------------------------------------------------------------------|
| <p>Subject: Math<br/>Skill: lines-line-segments-and-rays<br/>Description: What is this?<br/><br/>Picture:<br/>Choices: [line, line segment, ray, ]<br/>Answer index: 1</p>                                                                         | <p>Subject: Math<br/>Skill: make-predictions-with-scatter-plots<br/>Description: Based on the scatter plot below, which is a better prediction for x when y = 46?<br/><br/>Picture:<br/>Choices: [50, 98, ]<br/>Answer index: 0</p>                                                           |
| <p>Subject: Math<br/>Skill: match-addition-sentences-and-models-sums-to-10<br/>Description: Which shows 2+2=4?<br/>Picture: None<br/><br/>Choices:<br/>Answer index: 0</p>                                                                         | <p>Subject: Math<br/>Skill: match-analog-and-digital-clocks<br/>Description: Look at the analog clock: Which digital clock shows the same time?<br/><br/>Picture:<br/><br/>Choices:<br/>Answer index: 0</p> |
| <p>Subject: Math<br/>Skill: match-analog-clocks-and-times<br/>Description: What time does the clock show?<br/>Picture:<br/><br/>Choices: [5:00, 4:30, ]<br/>Answer index: 0</p>                                                                    | <p>Subject: Math<br/>Skill: match-clocks-and-times<br/>Description: What time does the clock show?<br/>Picture:<br/><br/>Choices: [eight fifty, seven fifty, nine forty, ]<br/>Answer index: 1</p>                                                                                            |
| <p>Subject: Math<br/>Skill: match-digital-clocks-and-times<br/>Description: Which clock shows six thirty-five?<br/>Picture: None<br/><br/>Choices:<br/>Answer index: 1</p>                                                                        | <p>Subject: Math<br/>Skill: match-exponential-functions-and-graphs<br/>Description: formula_desc.png<br/>Picture: None<br/><br/>Choices:<br/>Answer index: 0</p>                                                                                                                            |
| <p>Subject: Math<br/>Skill: match-exponential-functions-and-graphs-ii<br/>Description: formula_desc.png<br/>Picture: None<br/><br/>Choices:<br/>Answer index: 2</p>                                                                              | <p>Subject: Math<br/>Skill: match-fractions-to-models-halves-thirds-and-fourths<br/>Description: Look at the colored part of each shape. Which shape shows one-fourth?<br/>Picture: None<br/><br/>Choices:<br/>Answer index: 2</p>                                                         |
| <p>Subject: Math<br/>Skill: match-mixed-numbers-to-models<br/>Description: Which mixed number is shown?<br/>Picture:<br/><br/>Choices: [3 3/8, 4 2/8, 3 2/8, 3 5/8, ]<br/>Answer index: 0</p>                                                    | <p>Subject: Math<br/>Skill: mean-find-the-missing-number<br/>Description: Susan has the following data: If the mean is 25, which number could r be?<br/>Picture:<br/><br/>Choices: [29, 38, ]<br/>Answer index: 0</p>                                                                       |
| <p>Subject: Math<br/>Skill: mean-median-mode-and-range-find-the-missing-number<br/>Description: Jayla has the following data: If the mean is 14, which number could s be?<br/>Picture:<br/><br/>Choices: [11, 3, ]<br/>Answer index: 0</p>       | <p>Subject: Math<br/>Skill: measure-angles-with-a-protractor<br/>Description: Is this angle acute, right, or obtuse?<br/>Picture:<br/><br/>Choices: [right, obtuse, acute, ]<br/>Answer index: 2</p>                                                                                        |
| <p>Subject: Math<br/>Skill: median-find-the-missing-number<br/>Description: Danny has the following data: If the median is 97, which number could c be?<br/>Picture:<br/><br/>Choices: [98, 47, ]<br/>Answer index: 0</p>                        | <p>Subject: Math<br/>Skill: model-and-solve-equations-using-algebra-tiles<br/>Description: Which equation does this set of algebra tiles represent?<br/>Picture:<br/><br/>Choices: [-4x-1=-9, -8x-1=-9, 8x-1=-9, -x-1=-10, ]<br/>Answer index: 3</p>                                        |
| <p>Subject: Math<br/>Skill: model-and-solve-linear-equations-using-algebra-tiles<br/>Description: Which equation does this set of algebra tiles represent?<br/>Picture:<br/><br/>Choices: [3x=27, 3x=24, 2x=26, 2x=24, ]<br/>Answer index: 1</p> | <p>Subject: Math<br/>Skill: more<br/>Description: Which group has more?<br/>Picture: None<br/><br/>Choices:<br/>Answer index: 0</p>                                                                                                                                                        |

Table 24: Question examples for each skill (part 4).



|                                                                                                                                                                                                                                                                                                                                                                                                                                                        |                                                                                                                                                                                                                                                                                                                                            |
|--------------------------------------------------------------------------------------------------------------------------------------------------------------------------------------------------------------------------------------------------------------------------------------------------------------------------------------------------------------------------------------------------------------------------------------------------------|--------------------------------------------------------------------------------------------------------------------------------------------------------------------------------------------------------------------------------------------------------------------------------------------------------------------------------------------|
| <p>Subject: Math<br/>Skill: reflection-rotation-and-translation<br/>Description: How has this figure been transformed?It has been...</p>  <p>Picture:<br/>Choices: [translated, <b>reflected</b>, rotated, ]<br/>Answer index: 1</p>                                                                                                                                  | <p>Subject: Math<br/>Skill: regular-and-irregular-polygons<br/>Description: Is this shape a regular polygon?</p> <p>Picture:<br/>Choices: [yes, <b>no</b>, ]<br/>Answer index: 1</p>                                                                                                                                                       |
| <p>Subject: Math<br/>Skill: represent-numbers-up-to-10<br/>Description: Which group has 6 triangles?</p> <p>Picture: None</p>  <p>Choices:<br/>Answer index: 0</p>                                                                                                                                                                                                    | <p>Subject: Math<br/>Skill: represent-numbers-up-to-20<br/>Description: Which picture shows 8 dots?</p> <p>Picture: None</p>  <p>Choices:<br/>Answer index: 0</p>                                                                                        |
| <p>Subject: Math<br/>Skill: represent-numbers-with-pictures-up-to-3<br/>Description: Which shows 2?</p> <p>Picture: None</p>  <p>Choices:<br/>Answer index: 0</p>                                                                                                                                                                                                     | <p>Subject: Math<br/>Skill: represent-numbers-with-pictures-up-to-5<br/>Description: Which shows 1?</p> <p>Picture: None</p>  <p>Choices:<br/>Answer index: 0</p>                                                                                        |
| <p>Subject: Math<br/>Skill: represent-numbers-with-shapes-up-to-3<br/>Description: Which group has 3 circles?</p> <p>Picture: None</p>  <p>Choices:<br/>Answer index: 0</p>                                                                                                                                                                                           | <p>Subject: Math<br/>Skill: represent-numbers-with-shapes-up-to-5<br/>Description: Which group has 4 hexagons?</p> <p>Picture: None</p>  <p>Choices:<br/>Answer index: 0</p>                                                                             |
| <p>Subject: Math<br/>Skill: rhombuses<br/>Description: Which shape is a rhombus?</p> <p>Picture: None</p>  <p>Choices:<br/>Answer index: 0</p>                                                                                                                                                                                                                       | <p>Subject: Math<br/>Skill: rotational-symmetry<br/>Description: Does this picture have rotational symmetry?</p>  <p>Picture:<br/>Choices: [<b>no</b>, yes, ]<br/>Answer index: 0</p>                                                                    |
| <p>Subject: Math<br/>Skill: rotational-symmetry-amount-of-rotation<br/>Description: This image has rotational symmetry. What is the smallest fraction of a full turn you need to rotate the image for it to look the same?</p>  <p>Picture:<br/>Choices: [1/2 of a full turn, 1/6 of a full turn, 1/4 of a full turn, 1/3 of a full turn, ]<br/>Answer index: 0</p> | <p>Subject: Math<br/>Skill: scalene-isosceles-and-equilateral-triangles<br/>Description: Is this triangle scalene?</p>  <p>Picture:<br/>Choices: [yes, <b>no</b>, ]<br/>Answer index: 1</p>                                                             |
| <p>Subject: Math<br/>Skill: select-figures-with-a-given-area<br/>Description: Which shape has an area of 7 square units? The shapes are made of unit squares.</p> <p>Picture: None</p>  <p>Choices:<br/>Answer index: 1</p>                                                                                                                                         | <p>Subject: Math<br/>Skill: select-fractions-equivalent-to-whole-numbers-using-models<br/>Description: Count the equal parts. What fraction does this picture show?</p>  <p>Picture:<br/>Choices: [2/4, 4/8, <b>8/2</b>, 2/8, ]<br/>Answer index: 2</p> |
| <p>Subject: Math<br/>Skill: select-solid-shapes<br/>Description: Which shape is a cone?</p> <p>Picture: None</p>  <p>Choices:<br/>Answer index: 2</p>                                                                                                                                                                                                               | <p>Subject: Math<br/>Skill: select-three-dimensional-shapes<br/>Description: Which shape is a rectangular prism?</p> <p>Picture: None</p>  <p>Choices:<br/>Answer index: 2</p>                                                                         |
| <p>Subject: Math<br/>Skill: select-two-dimensional-shapes<br/>Description: Which shape is a hexagon?</p> <p>Picture: None</p>  <p>Choices:<br/>Answer index: 2</p>                                                                                                                                                                                                  | <p>Subject: Math<br/>Skill: shapes-of-everyday-objects<br/>Description: Which is shaped like a cylinder?</p> <p>Picture: None</p>  <p>Choices:<br/>Answer index: 1</p>                                                                                 |

Table 25: Question examples for each skill (part 5).

|                                                                                                                                                                                                                                                                                                                                                                                                                                                                                                                                        |                                                                                                                                                                                                                                                                                                                                                                                                                                                                                                                                                                                                                                                                                                                                                                                                                                                                                                                                                        |
|----------------------------------------------------------------------------------------------------------------------------------------------------------------------------------------------------------------------------------------------------------------------------------------------------------------------------------------------------------------------------------------------------------------------------------------------------------------------------------------------------------------------------------------|--------------------------------------------------------------------------------------------------------------------------------------------------------------------------------------------------------------------------------------------------------------------------------------------------------------------------------------------------------------------------------------------------------------------------------------------------------------------------------------------------------------------------------------------------------------------------------------------------------------------------------------------------------------------------------------------------------------------------------------------------------------------------------------------------------------------------------------------------------------------------------------------------------------------------------------------------------|
| <p>Subject: Science<br/>Skill: animal-adaptations-feet-and-limbs<br/>Description: Star-nosed moles are found in many parts of North America. They live in burrows. The moles eat earthworms and nuts, which they find in the soil. The feet of the star-nosed mole are adapted for digging. Which animal's feet are also adapted for digging?</p> <p>Picture: </p> <p>Choices: <input type="radio"/> <input type="radio"/></p> <p>Answer index: 0</p> | <p>Subject: Science<br/>Skill: animal-adaptations-skins-and-body-coverings<br/>Description: Emerald tree boas live in the forests of South America. The tree boa is adapted to be camouflaged among green leaves. Which animal is also adapted to be camouflaged among green leaves?</p> <p>Picture: </p> <p>Choices: <input type="radio"/> <input type="radio"/></p> <p>Answer index: 1</p>                                                                                                                                                                                                                                                                                                                                                                                                                                                                          |
| <p>Subject: Science<br/>Skill: classify-elementary-substances-and-compounds-using-models<br/>Description: Complete the statement. Nitrogen is The model below represents a molecule of nitrogen. Nitrogen gas makes up nearly 80% of the air you breathe.</p> <p>Picture: </p> <p>Choices: [an elementary substance, a compound, ]</p> <p>Answer index: 0</p>                                                                                         | <p>Subject: Science<br/>Skill: classify-fruits-and-vegetables-as-plant-parts<br/>Description: People use lettuce plants for food. We usually eat the part of this plant that makes most of the food for the plant. Hint: A plant's leaves make food. A plant's seeds can grow into a new plant. Which part of the lettuce plant do we usually eat?</p> <p>Picture: </p> <p>Choices: [the leaves, the seeds, ]</p> <p>Answer index: 0</p>                                                                                                                                                                                                                                                                                                                                                                                                                              |
| <p>Subject: Science<br/>Skill: classify-matter-as-solid-liquid-or-gas<br/>Description: Is the water from a faucet a solid, a liquid, or a gas?</p> <p>Picture: </p> <p>Choices: [a solid, a liquid, a gas, ]</p> <p>Answer index: 1</p>                                                                                                                                                                                                               | <p>Subject: Science<br/>Skill: classify-matter-as-solid-or-liquid<br/>Description: Is a coin a solid or a liquid?</p> <p>Picture: </p> <p>Choices: [a liquid, a solid, ]</p> <p>Answer index: 1</p>                                                                                                                                                                                                                                                                                                                                                                                                                                                                                                                                                                                                                                                                   |
| <p>Subject: Science<br/>Skill: classify-rocks-and-minerals-by-color-and-shape<br/>Description: Select the black mineral.</p> <p>Picture: </p> <p>Choices: <input type="radio"/> <input type="radio"/></p> <p>Answer index: 0</p>                                                                                                                                                                                                                      | <p>Subject: Science<br/>Skill: classify-rocks-and-minerals-by-color-shape-and-texture<br/>Description: Select the brown rock.</p> <p>Picture: </p> <p>Choices: <input type="radio"/> <input type="radio"/></p> <p>Answer index: 1</p>                                                                                                                                                                                                                                                                                                                                                                                                                                                                                                                                                                                                                                 |
| <p>Subject: Science<br/>Skill: classify-rocks-as-igneous-sedimentary-or-metamorphic<br/>Description: Diorite is a type of rock. When melted rock cools below the earth's surface, it can form diorite. Diorite is usually made of large mineral grains. What type of rock is diorite?</p> <p>Picture: </p> <p>Choices: [sedimentary, igneous, ]</p> <p>Answer index: 1</p>                                                                          | <p>Subject: Science<br/>Skill: classify-symbiotic-relationships<br/>Description: Which type of relationship is formed when an Alcon blue caterpillar lives in a Myrmica ant nest? Read the passage. Then answer the question. Alcon blue butterflies spend the first part of their lives as caterpillars that live with Myrmica ants. When a caterpillar lives with the ants, it mimics, or pretends to be, an ant. The caterpillar can mimic the ants by copying their smell. The caterpillar can also make noises that make it sound like a queen ant. Queen ants receive more food and better protection than any other ants in the nest. So, when the caterpillar mimics an ant, the ants feed and protect the caterpillar instead of other ants in the nest.</p> <p>Picture: </p> <p>Choices: [mutualistic, commensal, parasitic, ]</p> <p>Answer index: 2</p> |
| <p>Subject: Science<br/>Skill: compare-ages-of-fossils-in-a-rock-sequence<br/>Description: This diagram shows fossils in an undisturbed sedimentary rock sequence. Which of the following fossils is older? Select the more likely answer.</p> <p>Picture: </p> <p>Choices: <input type="radio"/> fern <input type="radio"/> insect</p> <p>Answer index: 1</p>                                                                                      | <p>Subject: Science<br/>Skill: compare-amplitudes-and-wavelengths-of-waves<br/>Description: Select the wave with the greater amplitude.</p> <p>Picture: </p> <p>Choices: <input type="radio"/> <input type="radio"/></p> <p>Answer index: 0</p>                                                                                                                                                                                                                                                                                                                                                                                                                                                                                                                                                                                                                     |
| <p>Subject: Science<br/>Skill: compare-amplitudes-wavelengths-and-frequencies-of-waves<br/>Description: Select the graph of the wave with the greater amplitude. The graphs below describe two waves. The waves are traveling at the same speed.</p> <p>Picture: </p> <p>Choices: <input type="radio"/> <input type="radio"/></p> <p>Answer index: 1</p>                                                                                            | <p>Subject: Science<br/>Skill: compare-ancient-and-modern-organisms-use-observations-to-support-a-hypothesis<br/>Description: Which statement supports the following hypothesis? The American lobster and Homarus hakekensis have similar adaptations to survive underwater. The American lobster and Homarus hakekensis have similar adaptations to survive underwater.</p> <p>Picture: </p> <p>Choices: [Homarus hakekensis used its claws to find food underwater, The American lobster uses its claws to find food underwater, The American lobster uses its claws to find food underwater, The American lobster uses its claws to find food underwater, ]</p> <p>Answer index: 2</p>                                                                                                                                                                           |
| <p>Subject: Science<br/>Skill: compare-concentrations-of-solutions<br/>Description: The diagram below is a model of two solutions. Each green ball represents one particle of solute. Which solution has a higher concentration of green particles?</p> <p>Picture: </p> <p>Choices: [Solution B, Solution A, neither; their concentrations are the same, ]</p> <p>Answer index: 0</p>                                                              | <p>Subject: Science<br/>Skill: compare-magnitudes-of-magnetic-forces<br/>Description: Think about the magnetic force between the magnets in each pair. Which of the following statements is true? The images below show two pairs of magnets. The magnets in different pairs do not affect each other. All the magnets shown are made of the same material, but some of them are different shapes.</p> <p>Picture: </p> <p>Choices: [The magnitude of the magnetic force is smaller in Pair 2., The magnitude of the magnetic force is the same in both pairs., The magnitude of the magnetic force is smaller in Pair 1., ]</p> <p>Answer index: 1</p>                                                                                                                                                                                                             |
| <p>Subject: Science<br/>Skill: compare-properties-of-materials<br/>Description: Which is harder?</p> <p>Picture: </p> <p>Choices: <input type="radio"/> coin <input type="radio"/> wood</p> <p>Answer index: 1</p>                                                                                                                                                                                                                                  | <p>Subject: Science<br/>Skill: compare-properties-of-objects<br/>Description: Which property do these four objects have in common? Select the best answer.</p> <p>Picture: </p> <p>Choices: [sticky, sour, soft, ]</p> <p>Answer index: 2</p>                                                                                                                                                                                                                                                                                                                                                                                                                                                                                                                                                                                                                       |

Table 26: Question examples for each skill (part 6).

|                                                                                                                                                                                                                                                                                                                                                                                                                                                                                                                                                                                                                                                                                                                                                                                                                                                                                                                           |                                                                                                                                                                                                                                                                                                                                                                                                                                                                                                                                                                                                                                                                                                                                                                                                                                                                                                                                   |
|---------------------------------------------------------------------------------------------------------------------------------------------------------------------------------------------------------------------------------------------------------------------------------------------------------------------------------------------------------------------------------------------------------------------------------------------------------------------------------------------------------------------------------------------------------------------------------------------------------------------------------------------------------------------------------------------------------------------------------------------------------------------------------------------------------------------------------------------------------------------------------------------------------------------------|-----------------------------------------------------------------------------------------------------------------------------------------------------------------------------------------------------------------------------------------------------------------------------------------------------------------------------------------------------------------------------------------------------------------------------------------------------------------------------------------------------------------------------------------------------------------------------------------------------------------------------------------------------------------------------------------------------------------------------------------------------------------------------------------------------------------------------------------------------------------------------------------------------------------------------------|
| <p>Subject: Science<br/>Skill: use-data-to-describe-world-climates<br/>Description: Which statement best describes the climate of Santa Fe? Hint: Summers in the Northern Hemisphere occur in June, July, and August. Winters in the Northern Hemisphere occur in December, January, and February. Santa Fe, New Mexico, is a city in the United States. It has a semiarid climate.</p>  <p>Picture:<br/>Choices: [Winters have much lower temperatures than summers., Winters have less precipitation than summers., ]<br/>Answer index: 0</p>                                                                                                                                                                                                                                                                                          | <p>Subject: Science<br/>Skill: use-evidence-to-classify-animals<br/>Description: Placental mammals are a group of animals with similar traits. The following traits can be used to identify placental mammals: They give birth to live offspring. They have fur or hair. Observe the animals and read the descriptions. Select the one animal that has all of the placental mammal traits listed above. Sea otters have very thick fur. Their fur helps keep them warm in cold water. Female sea otters give birth to live offspring in the water. Red salamanders do not have lungs! They can breathe through their moist, smooth skin. Adult red salamanders live near rivers or ponds. They lay eggs with no shells under rocks or logs. The baby red salamanders live underwater.</p> <p>Picture: None<br/>Choices: <br/>Answer index: 0</p> |
| <p>Subject: Science<br/>Skill: use-evidence-to-classify-mammals-birds-fish-reptiles-and-amphibians<br/>Description: Fish are a group of animals with similar traits. The following traits can be used to identify fish: They have fins, not limbs. They make eggs with no shells. Observe the animals and read the descriptions. Select the one animal that has all of the fish traits listed above. Thresher sharks hatch from eggs with no shells. They have a long tail and fins. They can use their tail to hit and stun their prey. Thresher sharks live in salt water. Greater flameback woodpeckers have feathers and two wings. They use their strong beaks to make holes in trees. The woodpeckers use these holes as nests for their eggs, which have white shells.</p> <p>Picture: None<br/>Choices: <br/>Answer index: 0</p> | <p>Subject: Science<br/>Skill: use-punnett-squares-to-calculate-probabilities-of-offspring-types<br/>Description: In a group of dachshund dogs, some individuals have rough fur and others have soft fur. In this group, the gene for the fur texture trait has two alleles. The allele for rough fur (F) is dominant over the allele for soft fur (f). This Punnett square shows a cross between two dachshund dogs. What is the probability that a dachshund dog produced by this cross will be homozygous dominant for the fur texture gene?</p> <p>Picture: <br/>Choices: [3/4, 0/4, 2/4, 1/4, 4/4, ]<br/>Answer index: 2</p>                                                                                                                                                                                                                |
| <p>Subject: Science<br/>Skill: use-punnett-squares-to-calculate-ratios-of-offspring-types<br/>Description: In a group of Syrian hamsters, some individuals have short fur and others have long fur. In this group, the gene for the fur length trait has two alleles. The allele for short fur (F) is dominant over the allele for long fur (f). This Punnett square shows a cross between two Syrian hamsters. What is the expected ratio of offspring with long fur to offspring with short fur? Choose the most likely ratio.</p> <p>Picture: <br/>Choices: [3:1, 1:3, 0:4, 2:2, 4:0, ]<br/>Answer index: 2</p>                                                                                                                                                                                                                       | <p>Subject: Science<br/>Skill: use-scientific-names-to-classify-organisms<br/>Description: This organism is a mantled howler. Its scientific name is <i>Alouatta palliata</i>. Select the organism in the same species as the mantled howler.</p> <p>Picture: <br/>Choices: <br/>Answer index: 1</p>                                                                                                                                                                                                                                                                                                                                                                                                                                                          |
| <p>Subject: Science<br/>Skill: weather-and-climate-around-the-world<br/>Description: Does this passage describe the weather or the climate? Hint: Weather is what the atmosphere is like at a certain place and time. Climate is the pattern of weather in a certain place. A cloud forest is a mountain ecosystem that is home to a wide variety of species. The skies were mostly clear last week over this cloud forest, which is in Ecuador.</p>  <p>Picture:<br/>Choices: [weather, climate, ]<br/>Answer index: 0</p>                                                                                                                                                                                                                                                                                                              | <p>Subject: Technology<br/>Skill: cables<br/>Description: What kind of computer related plug or port do you see here?</p>  <p>Picture:<br/>Choices: [USB type-A port, HDMI plug, VGA port, USB type-C plug, ]<br/>Answer index: 3</p>                                                                                                                                                                                                                                                                                                                                                                                                                                                                                                                                                                                                            |
| <p>Subject: Technology<br/>Skill: font<br/>Description: Identify this font type</p> <p>ActionQuiz</p> <p>Picture:<br/>Choices: [Times Ancient Roman, Matisse ITC, Human521 BT, Bookman Old Style, ]<br/>Answer index: 2</p>                                                                                                                                                                                                                                                                                                                                                                                                                                                                                                                                                                                                                                                                                               | <p>Subject: Technology<br/>Skill: icons<br/>Description: This is a(n) old) logo of which famous app or program?</p>  <p>Picture:<br/>Choices: [Acrobat Reader, Google Pay, Microsoft Office PowerPoint, GoFundMe, ]<br/>Answer index: 2</p>                                                                                                                                                                                                                                                                                                                                                                                                                                                                                                                                                                                                    |
| <p>Subject: Technology<br/>Skill: logo<br/>Description: This is (part of) a (former) logo of which computer related brand?</p>  <p>Picture:<br/>Choices: [Imation, Cisco, Nintendo, Verbatim, ]<br/>Answer index: 3</p>                                                                                                                                                                                                                                                                                                                                                                                                                                                                                                                                                                                                                | <p>Subject: Technology<br/>Skill: others<br/>Description: What is the function of this key?</p>  <p>Picture:<br/>Choices: [Copy, Undo, Delete, Paste, ]<br/>Answer index: 1</p>                                                                                                                                                                                                                                                                                                                                                                                                                                                                                                                                                                                                                                                                |
| <p>Subject: Technology<br/>Skill: parts<br/>Description: What kind of computer component do you see here?</p>  <p>Picture:<br/>Choices: [Power Supply Unit, Computer Fan, CPU Socket, Molex Connector, ]<br/>Answer index: 2</p>                                                                                                                                                                                                                                                                                                                                                                                                                                                                                                                                                                                                       | <p>Subject: Technology<br/>Skill: peripherals<br/>Description: What kind of computer peripheral do you see here?</p>  <p>Picture:<br/>Choices: [Floppy Disk, DVD Spindle, Tablet, Bluetooth Headset, ]<br/>Answer index: 3</p>                                                                                                                                                                                                                                                                                                                                                                                                                                                                                                                                                                                                                 |
| <p>Subject: Technology<br/>Skill: photo<br/>Description: What type of video game console do you see here?</p>  <p>Picture:<br/>Choices: [Nintendo Wii, Microsoft Xbox One, Microsoft Xbox, Mattel Intellivision, ]<br/>Answer index: 0</p>                                                                                                                                                                                                                                                                                                                                                                                                                                                                                                                                                                                             | <p>Subject: Technology<br/>Skill: web<br/>Description: What meaning or function is usually associated with this web interface symbol?</p>  <p>Picture:<br/>Choices: [Storage for deleted files, Computer games, Reload/Refresh, Send e-mail, ]<br/>Answer index: 2</p>                                                                                                                                                                                                                                                                                                                                                                                                                                                                                                                                                                         |

Table 27: Question examples for each skill (part 7).
